# Supplementary material for: The Italian version of the extended Barcelona Music Reward Questionnaire (eBMRQ): a validation study and association with age, gender, and musicianship
Source: PeerJ. 2025 Feb 28;13:e18403. doi: 10.7717/peerj.18403 (PMC11874942; doi:10.7717/peerj.18403)
Supplement: Supplemental Information 2 [file peerj-13-18403-s002.xls]

## Sheet: data
i1	i2	i3	i4	i5	i6	i7	i8	i9	i10	i11	i12	i13	i14	i15	i16	i17	i18	i19	i20	i21	i22	i23	i24
5	5	5	5	5	5	5	5	5	5	5	5	3	5	2	5	5	5	5	3	5	5	5	5
4	5	5	5	5	5	4	3	5	5	3	5	3	5	1	5	5	5	4	1	5	5	2	3
4	2	4	4	5	4	5	5	5	5	5	5	5	5	5	5	5	5	5	1	5	5	5	5
5	3	5	3	5	5	5	5	5	5	5	4	3	5	4	5	4	5	4	2	5	5	4	4
5	5	5	5	5	5	5	5	5	5	5	5	5	5	5	5	5	5	5	2	5	5	5	5
4	3	5	5	5	5	4	5	5	5	4	5	4	5	4	5	5	5	4	3	5	5	3	3
4	4	4	5	5	4	4	3	4	5	5	3	4	4	3	4	5	4	5	4	4	4	4	4

## Sheet: parameters
	i1	i2	i3	i4	i5	i6	i7	i8	i9	i10	i11	i12	i13	i14	i15	i16	i17	i18	i19	i20	i21	i22	i23	i24
moda	4	5	5	5	5	5	4	5	5	5	5	5	3	5	5	5	5	5	4	3	5	5	5	3
md	3.97134	4.0247	4.7836	4.33794	4.12451	4.03561	3.77273	3.98617	4.73024	4.35277	3.82115	3.8004	3.30534	3.98419	3.0168	4.24308	4.29249	3.69368	3.86759	2.63241	4.21344	4.31126	3.82411	3.31917
sx	0.973521	1.1853	0.502819	0.934249	1.22062	1.0562	1.06733	1.09572	0.584463	0.786296	1.18206	1.08842	1.20033	1.2389	1.4727	0.875087	0.957775	1.16538	0.97255	1.2585	0.940304	0.818282	1.136	1.25719
Social Reward	0.1657	0.0649	-0.0098	-0.1834	0.0426	0.0846	0.2833	0.1928	-0.0263	-0.0232	0.0057	-0.0024	0.0773	0.0363	0.3105	0.0124	0.0092	-0.0238	0.0958	0.2848	0.0802	0.0406	0.0009	0.0989
Musical Seeking	0.1054	-0.2192	-0.0082	0.2187	0.0078	0.1068	0.122	0.2005	0.0277	-0.0011	-0.0183	0.0237	0.2115	-0.0262	0.0741	-0.0183	0.0133	0.0276	0.0743	0.1695	0.0026	0.0722	0.0131	-0.022
Emotional Evocation	0.0666	-0.0015	0.3608	0.0289	-0.0025	0.071	0.0332	0.0167	0.3522	0.0124	-0.0121	0.0082	-0.0551	0.2017	0.0209	-0.0012	0.036	0.0092	0.0253	-0.0042	0.1766	0.0541	0.0197	0.0108
Mood Regulation	0.0371	-0.0398	0.0118	0.0937	0.0128	0.0049	0.0736	-0.0288	0.0079	0.3536	0.0324	0.0296	-0.0083	0.0222	-0.0196	0.3882	0.065	-0.004	0.0383	-0.0302	0.0325	0.1804	-0.034	0.0173
Sensory-Motor	0.0495	-0.0051	0.0014	0.0266	-0.3092	-0.014	0.045	-0.038	0.0101	0.0187	0.3548	0.0217	0.0216	0.0371	-0.0033	0.0055	0.1715	-0.0106	0.0832	-0.0711	-0.0159	-0.0126	0.2734	0.0408
Absorption in Music	-0.0348	0.0127	-0.0308	-0.0007	0.0152	0.1537	-0.0209	0.0244	-0.012	-0.018	-0.0043	0.2584	0.0631	0.0785	0.0125	0.0132	-0.0037	0.3083	0.0347	0.0521	0.1131	0.0696	0.0637	0.2401
Music reward	0.0632	-0.0647	0.0672	0.0824	-0.0429	0.0928	0.079	0.0642	0.0803	0.0836	0.0603	0.0911	0.0714	0.0725	0.0419	0.0918	0.0584	0.0898	0.0673	0.0571	0.0806	0.0965	0.0654	0.0803
Sx F	1	1	1	1	1	1	1
