# Supplementary material for: The Italian version of the extended Barcelona Music Reward Questionnaire (eBMRQ): a validation study and association with age, gender, and musicianship
Source: PeerJ. 2025 Feb 28;13:e18403. doi: 10.7717/peerj.18403 (PMC11874942; doi:10.7717/peerj.18403)
Supplement: Supplemental Information 4 [file peerj-13-18403-s004.xlsx]

## Sheet: Sheet1
Participant	Age	Gender	Musicianship	eBMRQ1	eBMRQ2	eBMRQ3	eBMRQ4	eBMRQ5	eBMRQ6	eBMRQ7	eBMRQ8	eBMRQ9	eBMRQ10	eBMRQ11	eBMRQ12	eBMRQ13	eBMRQ14	eBMRQ15	eBMRQ16	eBMRQ17	eBMRQ18	eBMRQ19	eBMRQ20	eBMRQ21	eBMRQ22	eBMRQ23	eBMRQ24																				ZMS	ZEE	ZMR
1	18	M	NA	5	1	5	5	1	5	5	5	5	5	4	5	4	5	5	5	4	5	3	5	5	5	3	5
2	18	M	A	4	1	5	4	4	5	2	4	5	3	3	4	3	4	5	4	5	4	3	2	4	4	4	2
3	18	F	A	4	2	5	4	1	4	3	3	5	4	5	4	3	4	4	4	5	4	5	2	5	5	5	5
4	18	M	M	3	1	5	4	5	4	3	4	5	2	2	5	4	4	4	3	4	4	4	4	5	4	4	3
5	18	F	NM	4	2	4	5	1	5	3	2	4	5	3	5	1	2	1	4	5	3	2	1	4	4	5	3
6	18	M	NM	3	2	3	4	1	2	5	4	2	3	5	2	2	1	4	2	5	3	4	1	3	3	5	3
7	18	M	NM	4	2	5	3	4	5	4	3	5	5	2	4	3	5	2	5	2	4	4	3	4	5	2	5
8	19	F	NA	4	1	5	5	1	5	4	3	5	5	3	5	3	5	1	5	5	5	4	1	5	5	2	3
9	19	F	NA	4	4	4	4	1	4	5	5	5	5	5	5	5	5	5	5	5	5	5	1	5	5	5	5
10	19	F	NA	5	1	5	5	1	5	5	5	5	5	5	5	5	5	5	5	5	5	5	2	5	5	5	5
11	19	F	NA	4	3	5	5	1	5	4	5	5	5	4	5	4	5	4	5	5	5	4	3	5	5	3	3
12	19	F	NA	4	2	4	5	1	4	4	3	4	5	5	3	4	4	3	4	5	4	5	4	4	4	4	4
13	19	F	NA	4	1	5	5	1	5	3	3	5	5	5	5	3	5	4	5	5	5	5	3	5	5	5	4
14	19	F	NA	5	3	5	5	1	4	5	2	5	5	4	3	3	5	2	5	5	4	5	4	5	5	5	5
15	19	F	NA	5	1	5	5	1	5	5	5	5	5	5	5	5	5	5	5	5	5	5	3	5	5	5	5
16	19	M	NA	3	1	5	5	1	5	4	5	5	5	5	3	4	5	3	5	4	3	4	3	5	5	4	3
17	19	F	NA	3	2	5	5	1	2	3	3	5	5	5	3	3	3	2	4	5	3	5	2	2	4	2	2
18	19	F	NA	5	1	5	5	1	5	5	5	5	5	5	5	5	5	2	5	5	5	5	3	5	5	5	5
19	19	F	NA	3	1	4	1	5	4	3	2	1	2	1	2	3	1	5	2	3	2	2	4	2	4	2	2
20	19	F	NA	3	3	5	5	1	5	4	4	5	4	5	3	5	5	2	4	5	3	5	3	5	3	5	1
21	19	F	NA	5	1	5	5	1	5	4	4	5	5	5	5	4	5	5	5	5	5	4	4	5	5	5	4
22	19	F	NA	3	2	5	3	1	3	2	1	5	5	4	3	2	5	2	4	5	4	4	1	4	4	4	2
23	19	F	NA	4	4	4	4	4	4	4	4	4	4	4	4	4	4	4	4	4	4	4	3	4	5	4	4
24	19	F	NA	3	1	5	4	1	5	3	3	5	4	5	5	2	5	3	4	5	5	3	1	4	4	5	3
25	19	F	NA	3	1	5	5	1	5	4	3	5	4	4	3	3	5	2	4	4	3	4	3	4	4	2	3
26	19	F	NA	4	5	5	5	1	3	4	3	5	4	4	5	3	5	1	4	5	2	3	3	4	5	5	3
27	19	F	NA	4	1	5	5	1	5	5	5	5	5	5	5	5	5	1	5	5	5	5	2	5	5	5	1
28	19	F	NA	5	1	5	5	1	5	5	5	5	5	5	5	4	5	2	5	5	5	5	1	5	5	4	5
29	19	F	NA	4	3	4	4	3	4	3	4	3	3	4	4	4	2	5	4	3	4	3	5	3	5	3	4
30	19	F	NA	5	2	5	5	3	3	4	2	5	4	4	4	3	5	1	4	5	5	5	3	4	5	5	3
31	19	F	NA	4	2	4	4	1	5	4	4	5	4	4	4	3	4	1	4	5	4	5	2	4	4	5	3
32	19	M	A	5	1	5	5	2	5	4	5	5	5	3	4	5	5	2	5	5	4	3	2	5	5	5	3
33	19	F	A	5	1	4	4	1	4	3	3	4	5	5	4	5	1	4	4	5	3	4	3	3	5	3	3
34	19	F	NA	4	2	5	5	2	5	5	4	5	5	3	4	2	5	4	5	5	4	2	1	5	5	3	3
35	19	F	NA	4	2	5	5	1	5	5	5	5	5	5	5	5	5	1	5	5	5	5	5	5	5	5	5
36	19	F	NA	5	1	5	5	5	5	5	5	5	5	2	5	2	5	3	5	5	5	1	1	5	5	2	5
37	19	F	NA	5	1	5	5	1	5	5	5	5	5	3	5	4	5	5	5	5	5	4	4	5	4	5	4
38	19	F	NA	4	3	5	5	1	2	4	5	5	5	5	4	5	5	1	5	5	3	4	2	5	5	5	4
39	19	F	NA	2	1	5	5	1	5	5	5	5	5	3	5	5	5	3	5	5	5	5	2	5	5	4	4
40	19	F	NA	5	1	5	5	1	5	5	5	5	5	5	4	4	5	2	5	5	5	3	3	5	5	5	3
41	19	F	M	4	1	5	5	3	5	5	3	5	5	3	5	5	5	3	5	5	5	5	1	5	5	5	5
42	19	F	M	4	4	4	4	4	5	3	5	4	4	4	4	4	4	4	3	4	4	3	4	3	3	4	5
43	19	F	M	3	3	5	4	2	3	5	4	5	5	3	5	3	5	2	5	5	5	4	1	5	4	4	3
44	19	F	M	5	1	5	5	2	5	5	5	5	5	4	5	5	5	5	5	5	5	5	5	5	5	5	5
45	19	F	M	5	2	4	4	2	2	3	2	4	4	3	1	2	4	2	4	4	1	3	1	4	4	4	1
46	19	F	M	5	1	5	5	1	5	5	5	5	5	5	5	5	5	1	5	5	5	5	4	5	5	5	4
47	19	F	M	5	1	5	5	1	5	3	4	5	5	4	5	2	5	2	5	5	5	2	1	5	5	5	4
48	19	F	M	5	2	5	5	1	4	5	2	5	5	4	5	2	5	5	5	5	5	5	1	5	5	5	5
49	19	F	M	5	4	5	3	2	4	4	4	5	4	4	4	2	2	5	2	2	3	4	1	1	3	2	2
50	19	F	A	3	1	5	5	1	5	3	5	5	5	5	5	5	5	3	5	5	5	4	3	5	5	5	4
51	19	F	A	5	2	5	5	1	5	4	4	4	5	2	5	5	5	5	5	3	5	3	3	5	5	4	5
52	19	F	A	4	3	4	4	2	3	3	5	5	5	4	3	3	2	5	4	5	4	4	5	4	4	4	4
53	19	F	A	5	1	5	5	2	5	5	5	5	5	3	4	5	5	5	5	5	4	3	4	5	5	5	4
54	19	F	A	5	1	5	5	2	3	4	4	5	5	2	2	3	5	5	5	2	3	3	2	5	5	1	1
55	19	F	A	5	1	5	5	1	5	4	5	5	4	4	4	5	4	5	4	5	5	5	3	5	5	5	3
56	19	M	A	3	2	5	4	1	3	3	3	4	4	4	4	3	5	3	4	5	3	3	3	4	4	3	2
57	19	F	A	4	1	5	5	2	5	5	4	5	5	2	5	4	5	5	5	5	5	4	4	5	5	4	5
58	19	F	A	5	1	5	5	1	5	5	5	5	5	5	5	5	5	5	5	5	5	5	5	5	5	5	5
59	19	M	M	5	1	5	5	1	5	5	5	4	5	5	5	4	5	5	5	5	4	4	3	1	5	3	5
60	19	F	NM	3	1	5	5	2	5	5	5	5	5	3	5	5	5	1	5	5	5	3	5	5	5	3	5
61	19	F	NM	3	4	5	5	3	5	5	3	5	5	4	5	5	5	3	5	5	3	4	2	5	5	4	2
62	19	F	NM	1	3	4	2	2	1	2	2	4	3	3	1	1	2	1	3	4	2	2	1	3	3	3	1
63	19	F	NM	3	3	5	2	1	3	4	3	4	3	4	1	2	5	2	4	5	4	4	1	4	3	5	4
64	19	F	NM	3	1	4	5	1	3	3	2	5	5	3	2	4	5	2	5	5	5	4	1	4	5	5	3
65	19	F	NM	2	2	4	5	1	4	4	3	3	5	3	4	3	3	1	5	2	4	1	1	3	4	2	2
66	19	F	NM	1	2	5	4	2	3	2	3	4	5	3	2	1	4	5	4	4	4	5	2	4	3	2	2
67	19	F	NM	2	3	4	4	3	3	3	3	4	4	3	3	3	3	3	4	5	4	4	2	3	4	3	1
68	19	F	NM	4	1	5	5	2	4	4	3	5	5	4	4	4	4	4	5	5	5	4	3	5	5	5	3
69	19	F	NM	4	2	5	5	1	4	3	3	5	5	4	4	4	5	4	5	5	4	3	2	4	5	3	3
70	19	F	NM	5	1	5	5	1	5	4	5	5	5	5	5	3	5	5	5	5	5	4	3	5	5	5	2
71	19	F	NM	3	2	5	5	3	4	3	3	5	4	4	3	4	3	5	4	5	4	4	2	4	4	4	4
72	19	F	NM	3	1	4	3	1	2	5	5	5	5	5	5	4	4	3	4	5	5	5	4	4	5	5	4
73	19	F	NM	2	1	5	4	1	3	2	2	5	5	3	4	3	4	1	5	4	5	5	1	5	5	4	4
74	19	F	NM	5	1	5	5	1	5	3	5	5	4	5	5	3	4	5	4	5	4	4	1	5	5	5	3
75	19	F	NM	4	1	5	5	4	4	4	4	5	5	4	3	4	5	3	5	5	3	2	2	5	5	5	3
76	19	F	NM	4	1	4	5	1	4	4	3	4	3	4	4	2	2	2	3	5	3	4	1	3	4	5	3
77	19	F	NM	4	2	4	4	1	5	4	4	4	5	5	3	4	5	2	4	5	4	5	1	5	5	5	4
78	19	F	NM	5	1	5	5	1	5	5	4	4	5	5	5	3	4	1	5	5	5	4	1	4	5	5	5
79	19	F	NM	5	5	2	5	1	1	3	5	3	3	5	1	1	3	1	1	5	3	1	1	1	1	5	1
80	19	M	NM	2	1	4	4	1	3	4	4	5	5	5	1	5	5	1	4	5	3	5	4	3	5	5	4
81	19	F	NM	4	2	5	4	1	3	4	4	5	4	4	3	3	3	4	3	4	4	4	2	4	3	3	2
82	19	M	NM	5	5	5	3	3	3	3	2	2	2	4	5	5	4	4	5	5	5	5	3	2	5	1	5
83	19	F	NM	2	2	5	5	3	5	3	5	5	5	4	4	4	5	2	4	5	4	3	2	5	5	4	2
84	19	F	NM	2	2	5	5	1	2	1	3	4	4	4	2	2	1	1	3	5	3	5	3	3	3	3	1
85	19	F	NM	3	3	5	3	2	4	3	3	5	3	3	3	4	5	1	3	4	4	3	1	4	4	4	4
86	19	F	NM	4	1	5	5	1	5	5	3	5	5	5	5	4	5	3	5	5	5	5	3	5	5	5	5
87	19	F	NM	3	1	5	5	3	5	3	4	5	5	3	4	4	5	1	5	5	2	3	2	5	5	5	4
88	19	F	NM	5	1	5	5	1	5	3	5	4	5	5	5	3	5	1	5	5	5	5	3	5	5	5	4
89	19	F	NM	5	1	5	4	1	5	5	5	5	5	5	2	3	5	2	4	4	3	4	3	5	5	5	4
90	19	F	NM	4	1	5	5	1	4	5	4	5	5	5	4	5	5	4	5	5	5	5	1	5	4	5	1
91	19	F	NM	2	2	4	3	2	4	2	2	4	3	2	3	2	5	1	4	4	3	3	2	4	4	2	1
92	19	F	NM	4	1	3	5	1	4	3	5	5	5	5	3	5	4	4	5	5	5	4	2	5	4	4	5
93	19	F	NM	3	5	5	5	2	4	1	4	5	4	4	5	3	4	1	5	5	4	4	4	4	5	4	4
94	19	F	NM	2	2	4	2	3	2	2	4	5	4	2	2	2	4	1	4	2	3	3	2	3	4	2	2
95	19	F	NM	5	1	5	5	1	3	3	4	5	4	4	3	3	4	1	4	4	3	5	4	5	4	5	4
96	19	F	NM	4	1	5	5	1	5	5	2	4	5	5	1	4	5	1	5	5	2	5	2	5	5	5	4
97	19	M	NM	3	2	3	3	2	3	3	4	3	2	4	3	3	3	2	4	4	3	4	4	3	4	3	2
98	19	F	NM	1	4	5	3	4	2	1	4	5	4	3	2	2	3	3	3	5	4	1	1	2	3	5	5
99	19	F	NM	5	1	5	5	1	5	3	5	5	5	5	4	2	5	4	5	5	3	4	1	4	4	5	3
100	19	F	NM	4	4	5	5	1	1	1	1	5	5	4	2	1	3	1	5	4	1	5	1	5	5	4	1
101	19	F	NM	4	1	5	3	2	3	2	3	4	3	3	4	3	3	1	4	3	3	2	2	4	3	3	2
102	19	F	NM	5	1	5	5	1	5	5	5	5	5	4	3	3	4	2	5	5	1	4	4	4	5	4	2
103	19	F	NM	5	2	5	5	2	5	4	4	5	5	4	5	2	4	3	5	5	5	4	4	5	5	4	4
104	19	F	NM	4	1	5	5	4	4	4	4	5	5	5	4	4	4	4	5	5	3	4	2	3	5	5	3
105	19	F	NM	4	1	5	5	1	4	3	3	5	5	5	3	3	5	3	5	5	4	4	1	4	5	5	4
106	19	F	NM	3	1	5	5	3	5	4	5	5	5	2	4	4	3	1	5	5	5	5	3	5	5	5	5
107	19	M	NM	4	5	5	5	2	5	5	5	5	5	3	5	2	5	3	5	5	5	5	1	5	5	5	5
108	19	F	NM	4	1	5	4	1	4	4	3	5	5	5	5	5	3	1	5	5	4	3	2	4	5	4	3
109	19	F	NM	4	1	5	5	5	4	3	3	5	5	1	2	5	4	1	5	1	4	3	1	1	3	1	2
110	19	F	NM	3	2	5	5	1	3	5	4	5	5	5	3	4	5	2	5	5	3	5	2	4	5	4	2
111	19	F	NM	5	1	5	5	3	5	4	5	5	5	3	4	4	5	3	5	5	4	5	4	5	5	4	4
112	19	F	NM	5	1	5	5	2	5	5	5	5	5	5	5	4	5	3	5	5	5	5	5	5	5	5	5
113	19	F	NM	5	3	5	5	2	4	2	3	5	5	3	3	3	4	2	5	4	4	4	3	5	3	4	3
114	19	F	NM	5	1	5	5	1	4	3	4	5	3	3	2	5	5	3	3	5	2	4	2	5	4	5	2
115	19	F	NM	4	1	5	5	1	5	5	5	5	5	5	5	4	5	3	5	5	4	5	4	5	5	5	4
116	19	F	NM	4	3	5	4	1	4	3	5	5	5	4	5	3	5	1	5	4	5	4	1	5	4	3	3
117	19	F	NM	5	3	5	2	1	3	2	4	5	4	4	2	2	4	2	3	5	3	3	2	3	2	4	2
118	19	F	NM	4	1	5	5	1	5	2	4	5	4	5	5	3	5	2	3	5	4	5	5	4	4	5	4
119	19	F	NM	5	3	5	5	3	5	5	5	5	4	2	2	2	4	1	4	5	5	3	1	3	4	4	4
120	19	F	NM	5	1	5	5	1	5	2	4	5	5	4	5	3	5	2	5	5	5	5	3	5	5	5	4
121	19	F	NM	5	1	5	5	1	5	5	5	5	5	5	5	5	5	3	5	5	5	5	2	5	5	5	5
122	19	F	NM	5	1	5	5	1	4	5	3	5	5	4	4	5	5	5	5	5	5	5	1	4	5	5	2
123	19	F	NM	3	3	5	5	1	5	5	3	5	5	5	5	3	5	5	5	5	5	5	5	5	4	4	4
124	19	F	NM	5	2	5	5	4	3	5	3	5	5	5	4	4	2	2	5	5	4	5	3	5	5	4	3
125	19	F	NA	4	1	5	5	1	2	2	2	3	3	5	2	1	4	1	3	5	2	5	1	3	3	5	2
126	19	F	NA	4	1	5	5	1	2	4	5	5	5	5	3	5	5	1	5	4	5	5	1	4	5	5	5
127	19	F	NA	4	2	5	5	1	5	5	1	5	5	5	5	3	5	1	5	5	5	4	1	5	5	4	4
128	19	F	NA	4	1	5	5	1	5	5	3	5	5	5	5	5	5	2	5	5	3	5	2	3	5	5	4
129	19	F	NM	5	3	5	5	1	5	4	3	5	5	5	5	3	3	3	5	5	4	4	3	4	5	5	5
130	19	F	NM	5	1	5	5	1	5	5	5	5	5	5	5	5	5	5	5	5	5	2	3	5	5	5	5
131	19	M	NM	4	1	4	3	1	3	4	5	3	4	5	3	3	2	1	3	3	2	4	3	2	3	5	2
132	19	F	NM	5	1	5	5	2	5	4	4	5	5	5	5	3	5	5	5	5	4	4	4	5	5	4	4
133	19	F	NA	5	2	5	5	1	5	4	3	5	5	5	5	4	5	3	5	5	5	5	3	5	4	5	4
134	19	F	NA	4	3	5	5	1	3	3	2	5	4	5	3	2	4	5	4	5	4	5	1	5	5	4	3
135	19	F	NA	3	1	5	5	1	2	4	3	4	3	5	2	5	4	5	5	5	3	4	2	4	4	5	2
136	19	F	NA	2	1	4	5	1		1	1	5	4	5	4	2	4	1	4	5	4	4	2	3	4	4	4
137	19	F	NA	4	1	5	5	1	5	5	3	5	5	5	3	3	3	4	5	4	3	4	3	3	5	5	3
138	19	F	NA	5	5	5	5	1	5	4	5	5	5	5	5	5	5	4	5	5	4	3	3	5	5	5	5
139	19	F	NA	4	2	5	5	2	4	3	5	5	5	4	4	4	3	2	4	5	5	5	3	4	5	3	2
140	19	F	NA	5	1	5	5	1	5	5	5	5	5	5	5	5	5	5	5	5	5	5	5	5	5	5	5
141	19	F	NA	5	1	5	5	1	5	5	4	5	5	5	5	5	5	5	5	5	5	5	5	5	5	5	5
142	19	F	NA	3	2	5	5	3	5	5	4	5	4	3	4	4	5	1	5	5	5	5	3	5	5	4	4
143	19	F	NA	4	1	5	5	2	3	3	4	5	5	2	5	3	5	1	5	5	5	4	1	5	5	5	3
144	19	F	NA	3	1	4	5	1	5	3	5	5	5	3	5	5	5	1	5	5	3	5	3	5	5	4	5
145	19	F	NA	4	1	5	5	1	4	4	5	5	4	5	5	5	5	1	4	4	4	4	1	4	4	4	5
146	19	F	NA	3	1	3	3	1	1	3	2	3	4	3	2	3	3	1	4	3	3	3	4	4	3	3	3
147	19	F	NA	4	1	5	5	4	4	5	5	5	5	5	5	5	4	1	4	4	5	4	3	4	4	5	5
148	19	F	NA	4	2	4	4	2	4	3	3	4	4	4	5	4	3	1	4	5	4	4	1	5	4	4	3
149	19	F	NA	3	1	5	4	1	4	4	5	5	5	4	3	3	5	3	4	2	2	3	3	4	4	1	1
150	19	F	NA	3	1	5	5	1	5	5	5	5	5	5	5	5	5	5	5	5	5	5	3	5	5	5	5
151	19	F	NA	4	2	5	4	1	5	5	3	5	5	4	5	4	5	1	5	5	5	5	3	5	5	3	4
152	19	F	NA	3	1	4	5	1	5	5	5	5	5	5	5	5	4	4	5	5	5	5	5	4	5	5	5
153	19	F	NA	5	1	4	4	1	3	3	4	4	4	3	4	3	4	3	3	3	3	3	2	3	4	3	3
154	19	F	NA	5	1	5	5	1	4	4	3	5	5	5	4	4	4	3	5	5	4	5	3	4	5	5	4
155	19	F	NA	5	1	4	5	1	3	3	5	5	4	3	3	4	4	1	5	3	5	5	3	3	3	1	4
156	19	F	NA	5	1	5	5	1	5	5	4	5	5	5	5	4	5	3	5	5	5	4	1	3	4	5	4
157	19	F	NA	5	1	5	5	1	5	4	5	5	5	5	4	5	5	1	5	5	5	5	3	5	5	5	5
158	19	F	NA	5	4	5	3	2	4	4	4	5	4	4	5	3	2	1	4	5	4	4	1	4	3	4	4
159	19	F	NA	4	2	5	5	1	4	4	4	5	4	4	5	5	4	3	4	4	4	4	2	4	4	4	3
160	19	F	NA	4	1	4	5	1	5	3	4	4	4	5	5	4	2	2	4	4	5	5	2	4	5	4	5
161	19	F	NA	3	4	5	5	1	2	3	3	4	3	4	5	2	5	1	3	4	4	2	1	1	2	1	1
162	19	F	NA	4	1	5	5	1	5	5	4	5	5	5	4	4	5	2	5	5	5	4	3	5	5	5	5
163	19	F	NA	5	1	5	5	1	5	4	5	5	5	5	5	4	5	1	5	5	5	5	4	5	5	4	5
164	19	F	NA	4	2	4	4	1	4	4	4	4	4	4	3	3	3	3	4	3	3	4	2	2	3	3	2
165	19	F	NA	5	1	5	5	1	3	1	2	4	5	5	5	5	5	1	5	5	4	4	1	4	4	4	4
166	19	F	NA	4	5	5	5	1	4	3	2	5	5	5	4	2	5	2	5	4	4	4	3	5	5	4	3
167	19	F	NA	5	2	4	5	2	4	4	3	5	4	5	3	3	2	1	3	5	3	5	3	5	3	4	3
168	19	F	NA	5	1	5	5	1	4	4	4	5	5	4	4	4	3	3	5	5	5	4	2	4	5	4	3
169	19	F	NA	5	1	5	5	1	4	4	2	3	5	2	3	2	5	2	5	3	3	3	5	2	5	5	2
170	20	F	NA	4	1	4	5	1	4	4	2	4	5	5	4	3	3	3	5	5	4	4	2	4	5	5	2
171	20	F	NA	3	2	5	5	1	4	4	4	5	5	5	5	4	5	2	5	5	4	5	5	5	5	4	3
172	20	F	NA	4	3	4	4	4	4	4	4	4	5	5	5	5	5	5	4	4	4	4	4	4	4	4	5
173	20	F	NA	4	1	4	5	1	5	3	4	5	5	5	5	4	3	2	5	5	5	5	5	3	4	5	2
174	20	F	NA	4	3	4	2	1	4	5	3	5	5	5	5	3	5	5	5	5	4	5	3	4	5	5	4
175	20	F	NA	4	2	4	5	1	4	4	4	4	5	5	5	3	3	5	5	4	5	5	2	5	5	5	5
176	20	F	NA	5	1	5	5	1	5	3	2	5	5	5	5	3	5	4	5	5	5	5	2	4	5	5	5
177	20	F	NM	4	3	5	3	1	2	4	1	5	4	5	3	2	4	1	3	5	3	5	4	4	3	5	2
178	20	F	A	4	1	5	5	1	4	4	3	4	4	5	3	5	5	2	4	5	2	4	2	4	4	5	3
179	20	F	A	5	1	5	5	3	4	4	5	5	5	2	3	3	4	4	4	5	3	5	3	5	4	2	2
180	20	F	A	4	1	5	5	2	5	4	4	5	5	4	4	3	5	4	5	5	4	4	3	5	5	5	3
181	20	F	A	4	1	5	5	1	3	3	3	5	5	5	4	5	4	3	5	5	5	5	1	3	5	5	3
182	20	F	NA	4	2	4	5	1	4	3	3	4	3	5	4	2	3	3	3	5	3	4	1	2	3	4	3
183	20	F	NA	5	1	5	5	1	5	5	5	5	5	5	5	5	5	5	5	5	5	5	4	5	5	5	5
184	20	F	NA	5	2	5	5	1	5	5	5	5	5	5	5	5	5	5	5	5	5	5	3	5	5	5	5
185	20	F	NA	4	2	5	5	2	3	4	2	5	4	4	4	3	5	1	4	5	4	5	2	5	4	4	4
186	20	F	NA	5	1	5	5	1	5	5	5	5	5	5	5	5	5	5	5	5	5	5	5	5	5	5	5
187	20	F	NA	5	1	4	5	2	3	2	4	5	5	3	5	5	1	4	4	5	4	4	1	5	5	5	2
188	20	F	NA	5	3	5	5	3	1	5	5	5	5	4	2	1	5	1	4	5	3	5	1	3	1	3	3
189	20	F	NA	4	1	5	5	1	4	4	3	5	5	4	3	3	3	1	4	5	4	4	1	4	5	4	3
190	20	F	NA	4	2	5	4	1	5	4	3	5	4	4	4	2	3	2	4	5	3	4	2	4	4	4	4
191	20	F	NA	4	1	5	5	1	4	4	4	5	4	5	4	4	4	1	4	5	3	3	2	4	4	4	3
192	20	F	NA	3	3	5	4	1	4	3	3	5	4	4	2	2	4	3	4	5	4	4	1	4	3	5	4
193	20	F	NA	3	1	5	5	2	3	2	3	5	5	4	4	2	4	1	4	5	4	3	1	5	3	4	2
194	20	F	M	5	1	5	5	1	5	5	5	5	5	5	5	5	5	4	5	5	5	5	3	5	5	5	5
195	20	F	A	5	2	5	5	1	3	4	3	5	5	5	5	3	4	5	5	5	4	3	2	5	5	4	2
196	20	F	A	5	1	5	5	1	5	5	5	5	5	5	5	5	5	5	5	5	5	5	4	5	5	5	5
197	20	F	A	5	1	5	5	1	5	4	5	5	5	5	5	4	5	2	5	5	5	5	4	5	5	5	3
198	20	M	M	4	2	4	5	2	3	5	5	4	2	2	3	3	4	5	2	4	3	2	5	4	4	3	3
199	20	F	M	3	1	5	5	1	5	3	4	5	5	5	5	5	5	5	5	5	5	5	3	5	5	5	4
200	20	F	NM	5	2	5	2	2	4	4	5	5	4	5	5	5	5	5	5	5	4	5	1	3	4	5	4
201	20	F	NM	2	1	5	5	1	5	2	2	5	5	5	3	3	5	4	5	5	2	5	1	5	5	4	2
202	20	F	NM	5	1	5	5	1	5	5	5	5	5	5	5	5	4	1	5	5	5	5	5	5	5	5	3
203	20	F	NM	5	1	5	5	2	4	5	3	5	5	3	2	3	2	3	4	5	3	5	3	4	5	3	2
204	20	F	NM	2	2	4	5	1	4	4	4	4	4	4	4	4	4	2	5	5	4	2	2	5	4	4	3
205	20	F	NM	5	2	5	4	1	4	5	3	5	3	5	3	3	4	2	3	5	4	5	1	3	3	5	4
206	20	F	NM	4	1	5	5	1	3	3	3	5	5	5	4	4	5	3	5	5	2	5	3	5	5	5	2
207	20	F	NM	4	4	5	5	2	2	4	5	5	4	4	4	3	4	4	4	5	5	4	4	4	4	4	3
208	20	F	NM	5	1	5	5	4	5	3	5	5	5	4	5	5	5	2	5	5	5	5	5	5	5	4	3
209	20	F	NM	5	1	5	3	1	5	3	3	5	5	4	3	2	5	2	5	5	3	5	1	5	3	5	3
210	20	F	NM	5	3	5	5	1	4	3	3	5	5	4	4	3	4	5	4	5	3	4	1	2	3	2	1
211	20	F	NM	5	1	5	5	3	5	2	5	5	5	5	5	5	5	1	5	5	5	5	3	5	5	5	5
212	20	F	NM	5	1	4	5	2	4	4	4	4	4	2	3	3	2	2	4	5	2	3	2	2	3	2	3
213	20	F	NM	4	1	4	4	2	2	3	2	4	3	2	4	3	4	3	3	5	3	4	1	4	3	2	3
214	20	F	NM	3	4	5	4	3	2	3	1	5	2	3	2	2	4	1	2	4	3	4	1	3	3	4	1
215	20	F	NM	5	1	5	5	5	5	5	5	5	5	2	5	5	5	5	5	5	5	5	5	5	5	2	5
216	20	F	NM	5	3	4	3	1	3	4	4	4	5	3	3	3	4	1	2	4	3	3	2	3	3	3	2
217	20	F	NM	3	1	5	5	1	3	5	3	4	5	5	5	4	3	2	5	5	4	4	1	5	5	5	4
218	20	F	NM	4	1	5	5	1	5	5	5	5	1	5	5	5	3	1	5	5	5	5	1	3	5	5	1
219	20	F	NM	4	5	5	5	1	5	5	5	5	5	5	5	5	5	4	5	5	5	5	3	5	5	5	5
220	20	F	NM	2	4	5	3	3	2	2	1	5	5	2	2	3	4	2	4	2	1	1	1	5	4	2	2
221	20	F	NA	4	1	5	5	1	4	4	3	5	5	4	4	5	1	4	5	5	4	5	4	3	5	5	4
222	20	F	NA	5	1	5	4	3	2	5	2	5	4	4	4	3	5	1	4	5	4	5	4	5	5	5	4
223	20	F	NA	3	3	5	5	1	4	2	3	5	5	5	4	4	3	2	5	4	4	2	2	3	4	3	2
224	20	F	NA	4	5	5	1	1	3	3	3	5	5	4	1	3	1	1	3	4	1	3	2	4	3	3	1
225	20	F	NA	2	2	4	4	2	4	4	3	4	2	4	4	2	4	1	2	4	4	4	2	4	3	4	4
226	20	F	NA	3	2	4	5	1	4	4	4	4	4	4	4	4	4	2	4	5	3	4	2	4	4	4	3
227	20	F	NA	2	1	4	3	2	5	3	2	4	4	2	5	2	2	5	4	5	5	3	2	4	5	2	3
228	20	F	NA	4	3	4	5	3	4	5	5	5	5	4	4	3	3	3	5	5	5	5	2	3	4	4	3
229	20	F	NA	5	1	5	5	1	5	5	5	5	5	5	5	5	5	3	5	5	5	5	3	5	5	5	5
230	20	F	NA	5	2	5	5	3	5	5	5	5	5	5	5	3	4	1	5	5	5	5	3	5	5	5	4
231	20	F	NA	2	1	4	4	1	5	4	2	4	5	5	5	2	3	4	5	5	5	5	1	4	5	5	5
232	20	F	NA	4	2	5	5	1	3	4	3	5	5	5	4	3	4	1	5	5	4	3	3	5	4	5	4
233	20	F	NA	3	1	4	4	1	1	4	3	5	4	2	3	2	5	1	4	5	3	5	1	5	4	3	2
234	20	F	NA	5	1	5	5	1	5	3	4	5	5	5	5	3	5	3	4	5	4	4	3	5	5	4	3
235	20	F	NA	4	2	4	5	2	5	4	4	4	4	4	4	4	3	1	4	5	4	4	2	4	4	4	4
236	20	F	NA	4	3	5	5	1	5	5	5	5	5	5	5	3	5	3	5	5	5	5	3	5	5	5	5
237	20	F	NA	3	1	5	5	5	5	4	5	5	5	2	4	5	5	5	5	5	5	2	1	5	5	3	4
238	20	F	NA	5	1	5	5	1	5	5	4	5	5	5	5	3	5	1	5	5	5	5	3	5	5	5	5
239	21	F	NA	5	1	5	5	1	5	4	5	5	4	5	5	5	5	3	4	5	5	5	4	5	5	5	5
240	21	F	NA	4	3	5	4	1	4	4	3	5	3	4	3	1	5	2	3	4	4	4	2	5	4	3	4
241	21	F	NA	5	1	4	5	1	4	4	4	4	5	5	5	4	4	3	5	5	5	4	4	5	4	5	4
242	21	F	NA	2	4	3	4	4	5	4	5	4	5	4	5	5	4	4	4	3	2	2	3	5	4	4	4
243	21		NA	5	2	5	4	1	3	4	5	5	4	5	4	5	5	2	5	5	3	4	2	5	5	5	4
244	21	F	NA	5	4	4	5	1	5	1	5	5	4	5	3	4	3	1	3	5	2	3	1	3	4	5	1
245	21	F	NA	4	2	5	5	1	5	5	5	5	5	5	5	5	5	5	5	5	4	5	2	5	5	5	5
246	21	F	NA	3	1	5	5	1	3	3	1	5	5	5	5	3	5	4	5	5	2	3	1	2	2	5	1
247	21	F	NA	5	1	5	5	1	5	3	5	5	5	5	5	2	5	1	5	5	4	4	1	5	5	5	1
248	21	F	NA	4	1	5	4	1	4	4	5	5	4	5	3	4	4	2	5	4	3	4	3	4	4	4	3
249	21	F	NA	5	2	5	5	1	5	5	5	5	5	5	5	5	5	5	5	5	5	5	4	4	5	5	4
250	21	F	NA	4	1	5	5	1	3	4	4	4	4	4	4	3	4	3	4	4	4	3	2	4	4	4	4
251	21	F	NA	5	5	5	5	1	5	5	5	5	5	5	4	4	5	4	5	5	3	3	3	5	5	5	4
252	21	F	NA	5	2	4	5	1	4	3	1	3	5	5	4	4	2	3	4	5	4	4	4	2	3	4	2
253	21	F	NA	4	1	5	5	1	4	3	3	5	5	4	4	3	5	2	5	5	5	3	1	2	5	5	3
254	21	F	NM	4	1	5	5	1	5	4	4	5	5	5	3	4	5	2	5	4	2	5	3	5	5	5	3
255	21	F	NA	4	3	5	4	1	1	4	5	5	4	5	3	3	5	4	4	5	4	5	2	4	4	5	3
256	21	F	NA	5	1	5	5	1	5	3	4	5	4	5	4	5	5	3	4	5	4	4	2	4	4	5	2
257	21	M	A	4	3	5	3	2	2	2	5	5	4	3	3	1	3	4	4	5	2	4	1	4	4	4	3
258	21		A	2	1	5	4	3	5	3	5	5	5	3	4	4	5	5	5	4	5	4	3	4	4	3	5
259	21	F	NA	4	1	4	3	1	3	4	3	3	3	5	3	3	3	4	4	5	4	4	2	3	3	5	4
260	21	M	NA	5	1	5	5	2	4	4	5	5	5	3	3	4	2	4	4	5	2	2	2	2	3	4	3
261	21	F	NA	3	3	4	4	1	3	3	2	3	4	4	3	2	3	1	3	4	3	3	2	3	4	3	2
262	21	F	M	4	3	5	5	1	4	5	5	5	5	5	5	4	5	5	4	5	4	5	5	3	4	4	3
263	21	F	M	5	1	5	5	1	5	5	5	5	5	5	5	5	5	5	5	5	5	5	5	5	5	5	5
264	21	F	M	3	1	5	4	1	4	4	5	5	4	4	4	3	1	5	4	4	4	4	5	5	4	4	4
265	21	M	M	4	2	4	3	2	5	4	3	5	3	4	4	5	2	5	4	3	5	5	1	4	4	4	5
266	21	F	M	5	1	5	5	3	5	3	5	5	4	3	5	5	5	4	4	4	5	5	5	5	5	3	5
267	21	F	A	3	2	5	5	1	4	4	5	5	5	5	4	3	5	2	4	5	3	4	3	3	4	3	3
268	21	M	A	5	1	5	4	1	5	3	3	5	4	5	5	5	5	3	4	2	3	3	2	5	4	3	2
269	21	F	A	5	2	5	4	3	4	2	4	5	4	4	3	3	5	4	5	5	4	5	4	5	4	3	1
270	21	F	A	4	2	5	5	1	5	2	2	5	4	5	5	2	5	5	5	5	5	4	2	4	5	5	5
271	21	F	A	3	1	5	5	1	5	5	5	5	5	5	5	5	5	5	5	5	5	5	5	5	5	5	2
272	21	F	A	5	1	5	5	1	5	5	5	5	5	5	5	5	5	5	5	5	5	5	3	5	5	5	5
273	21	F	A	4	2	5	5	2	5	4	3	4	4	3	2	2	2	3	5	4	2	4	2	4	4	4	3
274	21	M	A	4	2	5	4	2	4	4	5	5	4	4	4	4	5	5	4	5	4	4	3	5	4	4	5
275	21	F	A	5	3	5	4	1	4	5	4	5	5	5	5	4	5	5	4	5	4	4	3	4	5	5	1
276	21	F	A	5	1	5	5	1	5	5	5	5	5	5	4	4	5	5	5	5	5	5	4	4	5	4	5
277	21	F	A	4	1	4	4	1	4	4	4	4	4	4	4	5	4	4	4	3	3	2	2	4	4	3	2
278	21	F	A	3	4	4	3	3	3	3	4	4	4	3	3	2	3	2	4	3	3	3	1	2	3	3	3
279	21	M	M	3	2	5	5	3	5	5	5	5	3	2	5	5	5	5	3	5	5	4	4	4	5	4	3
280	21	F	M	1	1	5	5	1	5	1	1	5	5	5	5	5	5	1	5	5	5	3	1	5	5	5	5
281	21	F	NM	4	1	5	5	2	5	4	5	5	5	4	4	5	4	4	5	4	3	5	4	4	4	4	3
282	21	M	NM	4	1	5	5	3	5	4	4	5	5	2	3	3	2	1	4	4	2	5	2	5	3	2	2
283	21	F	NM	5	1	5	5	1	5	5	4	5	5	5	5	3	4	3	5	5	4	3	2	4	5	5	3
284	21	F	NM	3	2	4	4	1	4	4	4	4	4	4	4	4	4	1	4	5	5	4	2	5	5	4	2
285	21	F	NM	3	1	5	5	1	3	3	2	5	4	5	4	2	4	1	5	4	1	3	1	4	5	4	2
286	21	F	NM	5	2	5	5	1	2	3	4	5	4	5	2	2	3	1	3	5	3	5	2	2	5	5	1
287	21	M	NM	4	1	4	5	5	4	3	5	5	3	1	1	2	1	1	1	2	3	1	1	4	4	2	3
288	21	F	NM	4	2	3	4	2	4	2	4	4	4	2	4	2	4	2	4	5	4	2	1	4	4	4	3
289	21	F	NM	3	1	5	5	1	5	4	3	5	5	4	4	3	5	5	4	5	4	4	1	5	4	5	3
290	21	F	NM	3	1	4	4	3	3	3	4	4	4	2	4	3	2	3	4	3	3	3	1	2	4	2	1
291	21	F	NM	4	5	5	3	3	3	4	3	4	4	3	4	3	4	2	3	4	3	3	1	4	3	3	3
292	21	M	NM	5	1	5	5	2	3	4	5	5	4	4	5	5	5	3	5	5	5	4	5	5	5	3	4
293	21	F	NM	4	2	4	4	2	4	4	4	4	4	4	4	4	4	4	4	4	4	4	2	4	4	4	3
294	21	F	NM	1	1	4	5	1	5	2	2	5	5	5	5	2	4	1	5	3	4	1	1	2	4	4	1
295	21	F	NM	5	2	5	4	1	4	4	4	5	4	5	4	3	5	2	4	5	4	4	2	5	4	5	4
296	21		NM	4	1	5	5	1	5	2	5	5	4	5	5	3	5	1	5	5	5	3	1	5	5	4	3
297	21	F	NM	5	1	5	2	1	4	4	4	5	4	4	5	3	5	4	4	5	4	5	3	5	4	5	5
298	21	F	NM	5	3	5	4	2	2	4	4	5	4	2	1	4	5	2	3	4	3	4	1	5	4	2	3
299	21	M	NM	4	1	4	5	2	4	4	5	4	5	3	4	2	1	4	4	5	5	3	1	3	5	4	5
300	21	F	NM	4	2	5	4	2	5	2	2	5	4	5	3	2	5	4	5	5	3	5	2	5	5	4	2
301	21	F	NM	4	3	5	5	1	4	4	3	5	4	4	4	2	5	4	4	3	4	4	3	5	4	4	4
302	21	F	NM	4	1	5	4	1	3	3	4	5	4	4	3	2	4	3	4	4	2	4	2	4	4	4	2
303	21	F	NM	3	2	3	3	1	4	2	4	3	2	4	5	3	1	1	2	4	4	3	1	3	3	4	4
304	21	F	NM	4	1	4	4	2	4	4	5	4	4	3	3	4	4	2	3	4	3	4	2	3	3	3	3
305	21	F	NM	4	2	5	5	1	4	2	5	5	4	3	4	4	4	4	4	4	3	4	2	5	4	4	3
306	21	F	NM	5	2	4	4	1	4	2	1	4	4	5	2	2	4	3	5	4	2	4	1	4	3	4	3
307	21	F	NM	4	1	5	5	2	5	4	4	5	5	4	4	4	4	4	4	5	4	5	3	5	5	4	3
308	21	F	NM	5	1	5	5	1	4	5	4	5	5	4	4	3	4	3	5	5	4	4	1	5	5	4	3
309	21	F	NM	4	1	4	5	1	4	5	5	4	5	5	4	4	5	2	5	5	4	5	2	4	5	5	4
310	21	F	NM	2	3	5	4	1	3	3	5	5	5	5	5	3	2	1	4	4	4	5	2	1	3	5	3
311	21	F	NM	2	5	5	5	4	3	2	2	5	4	4	2	3	5	2	2	4	1	2	1	4	4	1	1
312	21	F	NM	5	1	5	5	3	5	5	2	5	5	2	5	5	5	2	5	5	5	5	5	5	5	2	4
313	21	F	NM	4	5	5	3	1	1	2	1	5	4	5	1	1	5	5	4	4	1	3	1	4	4	5	4
314	21	F	NM	3	2	2	5	1	2	3	5	3	4	4	1	3	1	3	4	5	3	5	3	1	2	5	1
315	21	F	NM	4	4	3	5	1	4	3	4	2	4	4	5	3	3	3	4	5	5	3	1	2	4	3	4
316	21	F	NM	4	2	5	5	1	2	4	5	5	5	4	5	2	5	1	5	5	4	4	1	5	5	4	1
317	21	F	NM	5	2	5	5	1	5	5	5	5	5	5	5	3	5	2	5	5	4	5	5	5	5	4	4
318	21	F	NM	5	1	5	5	1	5	5	5	5	5	5	5	5	5	2	5	5	5	5	4	5	5	5	5
319	21	F	NM	3	2	4	4	2	2	2	4	4	4	3	3	4	3	1	3	5	3	4	2	3	3	3	2
320	21	F	NM	5	2	5	5	1	5	5	5	5	5	5	5	5	5	3	5	5	5	5	3	5	5	5	5
321	21	F	NM	2	2	4	4	1	3	2	2	4	4	3	2	2	4	2	3	4	2	3	2	4	4	3	2
322	21	F	NM	4	1	5	4	1	5	4	4	5	5	5	4	4	4	4	5	4	4	4	3	4	4	4	4
323	21	F	NM	5	1	5	5	1	5	4	4	5	5	3	2	3	5	2	5	5	5	4	3	4	5	2	3
324	21	F	NM	5	1	5	5	1	5	5	4	5	5	5	4	4	5	2	5	5	5	4	3	5	5	5	4
325	21	F	NM	4	1	5	5	1	4	5	5	5	5	5	5	4	5	4	5	5	5	5	5	5	5	5	4
326	21	F	NM	5	2	4	4	2	1	2	1	4	4	3	2	2	2	4	3	1	3	5	1	2	4	4	3
327	21	F	NM	3	1	5	5	1	5	1	5	5	5	5	5	5	5	2	5	3	5	2	2	3	5	5	5
328	21	M	NM	5	2	4	4	3	3	4	5	4	4	2	3	5	1	1	3	2	2	3	1	2	4	2	1
329	21	F	NM	5	1	5	5	1	5	5	4	5	5	5	5	4	5	4	4	4	5	5	3	4	5	5	3
330	21	F	NM	3	4	4	4	1	3	3	3	4	3	4	4	4	2	1	3	4	3	4	1	3	4	4	1
331	21	F	NM	4	4	4	2	1	3	2	2	4	2	5	2	1	5	4	2	4	2	2	1	4	1	4	3
332	21		NM	5	5	5	2	4	2	1	2	4	5	2	2	1	4	1	4	4	2	1	1	3	5	2	3
333	21	M	NM	2	5	5	2	2	3	2	4	4	4	3	1	3	2	3	3	5	2	4	1	2	3	4	1
334	21	F	NM	2	3	4	2	3	1	2	2	4	3	3	2	2	2	5	2	4	1	3	1	3	4	2	3
335	21	F	NM	5	1	5	5	1	5	4	5	5	5	5	5	5	5	5	5	5	5	4	3	5	5	5	5
336	21	M	NM	3	1	3	5	1	4	5	5	4	5	5	5	5	3	4	5	5	4	4	3	4	4	4	4
337	21	F	NM	1	2	5	4	1	1	4	4	5	5	2	1	3	2	4	4	4	1	3	1	3	5	1	1
338	21	F	NM	4	1	5	4	1	4	5	5	5	5	4	4	5	5	4	5	5	4	5	3	5	5	4	4
339	21	F	NM	2	1	5	5	2	3	4	4	5	5	4	4	5	2	3	5	5	3	3	1	5	5	3	3
340	21	F	NM	5	1	5	5	1	5	5	5	5	5	4	5	5	5	3	5	5	4	3	3	5	5	4	3
341	21	F	NM	4	3	4	5	2	3	3	5	4	4	3	3	2	3	1	4	3	3	4	2	5	4	3	2
342	21	F	NM	2	4	3	5	1	3	2	4	5	2	1	3	4	5	1	5	2	4	3	1	5	4	3	2
343	21	M	NM	5	1	5	5	1	5	5	5	5	5	5	4	3	4	4	5	5	5	4	2	4	5	4	3
344	21	F	NM	5	4	4	4	1	4	2	2	4	4	5	3	2	4	5	4	5	3	4	2	4	4	5	2
345	21	F	NM	5	3	5	3	1	3	2	3	5	3	4	2	1	5	1	2	5	1	4	2	5	3	3	2
346	21	F	NM	3	1	5	5	1	5	3	4	5	5	4	3	5	5	2	5	5	3	5	2	4	5	4	4
347	21	F	NM	5	1	5	5	1	5	3	5	5	5	5	5	3	5	2	5	5	5	5	2	4	5	5	5
348	21	F	NM	3	4	4	2	2	2	3	3	3	3	4	2	2	4	1	3	4	1	4	2	4	4	4	2
349	21		NM	4	2	5	5	3	5	2	4	5	5	3	5	4	5	2	5	5	5	3	2	5	5	4	4
350	21	F	NM	3	2	5	4	1	3	4	4	5	4	4	3	2	4	2	5	5	4	3	1	3	4	5	3
351	21	F	NM	5	1	5	5	2	4	5	5	5	5	3	5	3	5	2	4	4	5	5	4	5	5	3	4
352	21	F	NM	5	1	5	5	1	5	5	5	5	5	5	4	5	5	3	5	5	4	5	2	5	5	5	3
353	21	F	NM	5	2	5	5	1	5	3	2	5	5	4	2	4	4	3	5	5	2	5	1	3	4	1	2
354	21	F	NM	4	1	4	5	1	3	2	4	4	4	4	5	2	1	3	3	5	3	5	1	1	4	3	2
355	21	F	NM	5	1	5	5	3	5	4	4	5	5	3	5	5	5	4	5	4	5	5	5	5	5	5	4
356	21	F	NM	5	1	5	5	3	4	3	3	5	4	3	4	2	4	3	4	5	4	5	3	5	4	2	2
357	21	F	NM	3	1	5	5	1	3	2	5	5	5	5	3	2	5	4	4	5	5	5	1	3	4	5	1
358	21	F	NM	4	1	5	4	2	3	2	4	5	4	2	3	2	5	4	3	4	2	4	1	3	5	1	1
359	21	F	NM	3	2	5	5	2	3	4	3	5	4	3	1	4	3	3	4	5	2	3	2	4	4	3	2
360	21	F	NM	4	1	4	5	1	5	5	5	4	5	4	3	5	4	5	5	5	3	5	5	4	5	4	3
361	21	F	NM	4	2	4	5	2	4	5	4	4	5	4	4	5	3	2	5	5	4	3	3	4	5	4	4
362	21	M	NM	5	1	4	5	2	5	5	5	4	5	3	5	5	2	2	5	5	5	5	3	5	5	4	5
363	21	F	NM	4	4	4	3	2	4	3	3	5	3	4	2	2	4	2	2	5	3	4	2	4	3	4	3
364	21	F	NM	5	1	5	5	1	5	5	5	5	5	5	5	5	5	3	5	5	5	4	4	5	5	5	2
365	21	F	NA	5	1	5	4	1	4	4	4	5	4	4	5	4	4	2	3	5	5	5	3	4	4	5	4
366	21	M	NM	2	2	3	5	5	1	1	3	2	4	1	1	2	1	1	5	2	1	1	1	2	4	3	1
367	21	F	NM	4	2	5	4	1	3	4	3	5	5	5	4	4	3	3	4	5	3	4	3	4	4	4	3
368	21	F	NA	4	3	4	5	1	3	3	3	4	4	4	4	3	3	2	4	5	3	3	2	2	2	5	3
369	21	F	NA	1	1	5	5	1	4	3	2	5	5	4	5	2	5	1	5	5	4	3	2	5	3	3	1
370	21	F	NA	5	1	5	5	1	5	5	5	5	5	5	5	5	1	1	5	5	1	5	1	1	5	5	1
371	21	F	NA	2	1	4	5	1	3	1	3	3	5	4	4	2	2	1	5	5	5	4	1	4	5	4	3
372	21	F	NA	5	1	5	5	1	5	5	5	5	5	5	4	5	5	5	5	5	3	5	1	5	5	5	5
373	21	F	NA	3	3	2	3	2	2	4	4	3	4	3	2	2	1	2	3	5	3	4	2	2	2	2	3
374	21	F	NA	3	1	5	5	1	5	5	5	5	5	5	5	3	1	1	5	5	5	5	2	5	5	5	5
375	21	F	NA	3	1	5	5	2	5	3	4	5	3	3	3	5	5	4	3	4	3	1	1	5	3	4	3
376	22	F	NA	5	5	5	5	2	4	3	5	5	4	4	2	3	5	3	5	5	3	4	1	4	4	4	3
377	22	F	NA	3	5	5	2	1	3	3	1	4	4	4	3	2	1	3	2	5	1	3	1	3	4	2	1
378	22	F	NA	4	1	5	5	1	5	5	4	5	5	5	4	3	5	3	5	4	5	4	2	5	5	4	4
379	22	F	NA	4	3	5	2	1	4	4	3	4	2	5	2	3	3	4	2	5	3	5	2	3	3	5	4
380	22	F	NA	1	5	3	2	1	1	3	4	3	3	5	1	5	1	3	2	5	1	4	1	3	1	5	1
381	22	F	NM	3	5	5	4	1	5	3	3	5	5	5	5	2	5	1	5	5	4	5	3	5	5	4	3
382	22	F	NM	4	1	5	5	1	5	3	4	5	5	5	3	3	5	3	5	5	4	4	2	5	4	4	2
383	22	F	NA	5	1	5	5	3	3	3	4	2	3	4	2	4	1	3	3	4	2	4	2	3	4	3	2
384	22	F	NA	4	1	5	5	1	5	5	5	5	5	5	5	5	5	2	5	5	4	5	5	5	5	1	2
385	22	F	NA	5	1	5	5	2	5	5	5	5	5	5	5	5	5	5	5	5	5	5	4	5	5	5	3
386	22	F	NA	4	1	5	5	1	4	4	3	4	4	5	4	4	5	4	4	5	4	4	2	5	5	5	4
387	22	F	NA	3	1	5	4	1	3	3	3	5	4	5	2	2	4	2	3	4	4	4	1	3	3	5	3
388	22	M	A	3	1	5	4	3	3	1	5	5	4	1	5	2	1	2	4	5	5	2	2	3	4	1	3
389	22	F	A	5	1	5	5	1	5	5	5	5	5	5	5	4	5	5	5	5	5	5	2	5	5	5	4
390	22	F	A	4	1	5	5	1	5	5	4	5	5	4	5	4	5	4	5	5	4	4	3	4	5	5	4
391	22	M	A	4	3	5	4	1	5	5	3	5	4	3	3	5	5	5	4	5	4	3	2	4	4	2	3
392	22	F	A	4	2	5	4	1	1	4	4	5	4	5	4	3	5	3	4	4	4	4	3	4	4	5	3
393	22	F	NM	5	1	5	5	1	5	5	5	5	5	5	5	5	5	5	3	5	4	4	3	4	5	5	5
394	22	F	NM	4	1	5	5	2	4	4	5	5	4	4	4	4	5	3	4	5	5	4	3	5	4	4	4
395	22	F	NM	4	1	4	5	1	5	4	5	5	5	5	5	5	5	4	5	5	4	5	3	4	5	4	3
396	22	F	NM	4	2	4	3	2	3	2	4	4	4	1	2	5	5	3	3	4	3	4	1	4	4	2	2
397	22	F	NM	5	1	5	5	1	5	3	5	5	5	5	5	4	5	5	5	5	4	4	1	5	4	5	4
398	22	M	NM	5	1	5	5	1	3	3	4	5	5	4	5	5	5	5	5	4	2	5	3	4	4	4	4
399	22	F	NM	5	1	5	5	2	1	2	4	5	5	5	2	2	2	1	5	5	2	5	1	2	4	2	1
400	22	F	NM	4	1	5	5	1	4	2	2	5	4	5	4	1	4	2	5	5	4	3	2	5	4	5	2
401	22	F	NM	5	1	5	5	1	5	5	4	5	5	2	5	3	5	5	5	4	4	5	3	5	5	3	3
402	22	F	NM	4	1	4	5	1	5	4	5	5	5	5	2	3	5	4	5	5	1	3	2	4	5	3	3
403	22	F	NM	2	1	5	5	1	5	2	1	5	5	5	5	1	3	1	5	5	5	5	1	5	5	3	5
404	22	F	NM	1	5	5	3	3	1	3	1	5	3	3	5	3	1	3	5	5	3	5	1	5	3	1	1
405	22	F	NM	3	5	3	1	5	1	1	1	3	3	1	1	1	4	3	3	2	1	2	1	3	2	1	1
406	22	M	NM	5	1	5	4	3	4	4	3	5	5	3	4	2	5	5	5	5	4	3	2	4	5	2	1
407	22	M	NM	4	2	5	5	1	4	3	4	5	5	5	3	3	4	4	4	5	4	3	2	4	4	4	3
408	22	F	NM	5	1	5	5	4	4	5	5	5	5	5	4	4	5	1	5	5	4	5	3	5	5	4	4
409	22	F	NM	4	1	4	4	2	3	3	4	4	5	4	4	4	4	1	4	4	1	4	1	4	4	3	3
410	22	F	NM	5	1	5	5	2	5	4	4	5	5	3	5	4	4	2	5	4	5	5	4	5	5	4	3
411	22	F	NM	4	3	4	4	4	4	4	4	4	4	2	3	4	4	2	4	3	3	3	2	4	4	3	2
412	22	M	NM	5	1	5	5	1	4	4	5	5	5	5	4	3	5	3	5	5	5	4	1	5	5	5	5
413	22	F	NM	4	5	5	5	5	4	2	4	4	5	2	5	3	3	1	5	4	5	4	2	4	5	1	4
414	22	F	NM	5	1	5	5	1	5	5	5	5	5	3	5	5	3	1	5	3	5	3	2	4	5	2	5
415	22	F	NM	4	1	5	5	1	5	5	5	4	5	5	4	4	4	5	5	5	4	4	2	5	5	5	4
416	22		NM	3	1	5	4	2	4	3	4	5	4	3	2	3	5	3	4	3	4	3	2	3	4	3	4
417	22	F	NM	3	2	3	4	2	2	2	2	3	3	3	2	2	2	2	3	4	3	3	2	2	3	3	2
418	22		NM	5	2	5	5	4	3	5	5	5	5	2	2	4	5	5	5	5	2	5	3	4	5	2	3
419	22	F	NM	5	1	1	5	3	4	3	5	2	5	3	4	5	1	4	5	4	3	4	3	4	5	2	2
420	22	F	NM	3	5	5	2	1	1	3	2	5	2	4	2	2	5	2	2	5	2	4	1	3	2	3	1
421	22	F	NM	5	1	5	5	2	4	4	4	5	5	4	3	4	5	1	4	5	2	4	2	4	4	5	2
422	22	F	NA	5	1	5	5	1	5	5	5	5	5	5	5	5	5	5	5	5	5	5	5	5	5	5	5
423	22	F	NA	5	4	5	5	1	3	3	2	5	5	5	5	5	5	5	5	5	5	2	3	5	5	5	5
424	22	F	NA	4	4	5	4	3	4	3	3	5	3	2	2	2	3	2	3	4	3	3	1	3	3	3	3
425	22	F	NA	5	1	5	5	1	5	2	5	5	5	5	5	4	5	2	5	5	5	5	3	5	5	5	5
426	22	F	NA	4	1	5	5	1	5	4	4	5	5	5	3	4	4	4	4	5	3	4	3	5	4	5	4
427	22	F	NA	5	1	5	5	1	5	5	5	5	5	5	5	4	5	1	5	5	5	5	3	5	5	5	5
428	22	F	NA	4	3	5	4	3	2	2	3	5	4	3	3	2	5	2	4	3	2	3	2	5	4	3	1
429	22	F	NA	3	2	5	5	1	4	3	3	5	4	5	4	4	4	1	4	4	3	3	1	4	4	4	3
430	22	F	NA	5	5	5	5	1	5	5	5	5	5	5	5	3	4	1	5	5	5	5	1	5	5	5	5
431	22	F	NA	4	1	5	3	3	3	5	5	5	5	3	4	4	5	1	5	5	4	4	3	5	5	3	2
432	22	F	NA	5	1	5	5	1	5	5	3	5	5	5	3	2	5	1	5	5	5	3	1	5	5	5	1
433	22	M	NA	4	1	5	4	1	5	3	5	5	5	5	2	4	4	2	5	5	3	3	2	5	3	4	3
434	22	F	NA	3	2	5	5	1	3	4	2	5	5	5	3	3	1	1	5	5	2	5	1	3	5	4	2
435	23	F	NA	3	1	5	5	1	5	5	5	5	5	5	5	4	4	2	5	5	5	5	4	5	5	5	4
436	23	F	NA	1	2	5	5	1	4	5	4	5	3	5	3	2	5	4	2	5	3	5	1	5	5	4	1
437	23	M	A	5	1	4	5	5	5	2	5	4	4	1	5	3	2	5	4	5	3	2	5	5	5	2	2
438	23	M	A	4	3	5	2	4	4	3	4	5	5	2	2	3	4	1	4	2	3	2	1	5	3	2	2
439	23	M	M	4	3	5	4	2	5	5	5	5	3	2	5	2	5	5	3	4	5	4	1	5	3	2	3
440	23	F	NM	4	1	5	5	1	5	3	4	5	5	5	5	3	5	1	5	5	4	1	1	4	5	5	5
441	23	F	NM	3	4	5	4	1	4	2	1	5	4	4	5	1	5	4	4	5	5	4	1	5	4	4	4
442	23	F	NM	3	2	5	5	1	5	3	4	5	5	4	5	2	5	4	4	5	4	4	2	5	5	5	4
443	23	F	NM	4	1	5	5	1	4	3	1	5	5	5	4	2	5	1	5	5	5	1	2	3	5	5	4
444	23	F	NM	4	1	5	5	1	5	3	5	5	5	5	5	5	5	3	5	5	5	2	1	5	5	5	5
445	23	M	NM	4	4	4	4	3	4	4	5	4	4	4	4	4	4	4	4	3	4	3	3	3	4	3	4
446	23	F	NM	5	1	5	5	1	5	5	5	5	5	5	5	5	5	5	5	5	5	5	5	5	5	5	5
447	23	M	NM	5	1	5	5	4	5	5	5	5	4	1	3	4	5	1	4	4	3	2	4	5	5	2	1
448	23	F	NA	5	1	5	5	1	5	2	3	5	5	5	5	5	5	1	5	5	5	4	1	5	5	5	5
449	23	F	NA	4	1	5	5	1	4	3	5	5	5	5	3	4	4	1	5	4	3	4	3	5	5	4	3
450	24	F	NA	5	1	5	5	1	5	4	3	5	5	5	5	5	5	3	5	5	5	4	2	5	5	5	5
451	24	M	NA	5	1	5	5	1	5	5	5	5	5	5	5	5	5	5	5	5	5	4	2	5	5	5	5
452	24	F	NA	4	3	4	4	1	3	3	4	4	4	5	3	3	4	1	3	4	3	4	1	3	4	5	3
453	24	M	A	3	1	5	4	3	4	3	4	4	3	4	3	4	2	5	3	4	3	3	2	4	4	4	4
454	24	M	A	3	1	4	4	2	4	4	4	4	4	3	3	3	2	2	4	4	3	4	3	3	4	3	3
455	24	M	A	3	1	5	4	3	4	3	3	5	4	3	4	5	5	4	4	4	4	1	3	5	4	3	3
456	24	F	A	3	3	5	3	1	3	5	3	5	4	5	4	3	5	5	4	5	3	3	3	4	4	5	2
457	24	F	NA	5	1	4	5	1	5	5	5	5	5	5	5	5	5	4	5	5	5	5	3	5	5	5	5
458	24	F	A	5	2	5	4	3	5	4	4	5	3	4	3	4	4	5	5	5	4	3	3	4	4	4	4
459	24	F	NM	4	4	5	5	3	2	3	4	4	4	3	3	3	4	1	4	4	2	4	2	5	4	4	2
460	24	M	NM	1	4	3	3	5	4	2	1	1	3	1	1	2	1	1	2	4	2	2	1	4	4	1	4
461	24	F	NM	4	2	4	5	2	3	4	3	5	4	4	4	2	4	4	4	4	4	4	1	3	4	4	2
462	24	F	NM	5	1	5	5	1	5	5	2	5	5	5	5	3	5	4	5	4	5	4	1	5	5	5	5
463	24	F	NA	5	1	5	5	1	5	5	5	5	5	5	5	5	5	2	5	5	5	5	5	5	5	5	5
464	24	F	NA	5	1	5	5	1	5	5	5	5	5	5	5	5	5	1	5	5	5	5	2	5	5	5	5
465	25	F	NA	3	2	5	4	1	3	3	4	5	4	4	3	2	5	4	4	5	4	4	2	5	4	4	3
466	25	F	NA	4	1	5	5	3	3	3	5	5	5	3	2	2	5	1	5	5	2	3	1	4	4	2	2
467	25	M	A	5	1	5	5	5	4	4	5	5	5	1	3	4	1	5	5	5	3	4	3	4	5	5	1
468	25	M	A	2	3	4	2	4	1	5	3	2	4	4	4	3	3	2	1	1	4	3	2	5	3	4	2
469	25	F	A	5	1	5	4	1	4	4	4	5	4	4	4	3	5	5	4	3	4	4	4	5	5	3	4
470	25	F	A	3	2	5	5	1	4	3	4	5	5	5	3	2	3	1	5	2	4	5	3	5	4	5	5
471	25	F	A	5	1	5	5	2	5	5	5	5	5	3	5	5	5	5	5	5	5	5	5	5	5	4	5
472	25	F	NA	4	3	5	3	2	3	4	2	5	5	4	4	2	3	1	4	5	5	5	1	4	4	5	3
473	25	F	A	5	1	5	5	1	5	5	5	5	5	4	5	4	5	4	5	5	5	5	5	5	5	5	4
474	25	M	NM	1	5	5	2	3	1	1	1	4	3	2	3	1	1	5	3	2	2	1	1	1	3	1	1
475	25	F	NM	4	3	5	5	2	3	4	3	5	5	5	2	1	5	1	5	5	2	2	1	5	5	5	3
476	25	F	NM	4	1	5	4	1	4	4	4	4	5	5	4	5	2	3	5	5	3	3	2	5	4	4	3
477	25	F	NM	5	2	5	5	1	4	4	5	5	5	4	4	5	5	2	5	5	3	3	3	4	4	5	4
478	25	F	NM	4	3	5	4	2	3	3	4	5	4	5	4	3	4	3	3	5	3	3	2	4	4	4	3
479	26	M	A	5	1	5	5	2	3	4	5	5	5	5	2	5	5	4	5	3	3	4	4	5	5	4	2
480	26	F	A	5	1	5	4	1	3	5	5	5	4	4	3	3	5	4	3	4	3	4	2	4	4	4	3
481	26	F	A	5	3	5	5	2	5	5	3	5	3	4	4	2	5	5	3	5	3	2	1	4	4	3	4
482	26	M	NM	3	2	5	5	2	2	2	3	5	4	3	4	2	1	4	4	5	3	3	1	4	4	4	1
483	26	F	NM	5	1	5	2	1	4	5	4	5	4	5	4	3	5	3	4	4	3	4	3	4	4	5	4
484	26	F	NM	4	1	5	5	1	5	5	3	5	5	5	5	3	5	2	5	5	5	3	2	5	5	5	5
485	26	M	NM	4	1	4	5	3	4	5	5	4	5	2	3	3	1	1	4	4	3	4	2	3	4	4	5
486	26	M	NM	4	2	5	5	1	4	3	4	5	4	5	3	3	3	3	5	5	3	4	2	3	5	5	2
487	26	F	NM	4	3	4	4	1	2	2	2	4	4	5	3	2	2	1	3	4	3	4	3	4	2	4	4
488	26	M	NM	5	3	5	4	3	4	2	2	5	4	4	4	4	4	2	4	4	4	3	1	5	4	4	3
489	26	M	NM	4	2	5	4	3	4	3	4	5	4	2	3	3	2	2	4	3	3	3	1	5	4	2	2
490	26	F	NM	2	2	5	4	1	2	2	2	4	4	4	2	2	3	4	4	3	2	4	1	4	4	3	2
491	27	M	A	4	1	5	4	2	4	4	3	5	4	4	4	4	4	4	4	5	4	4	3	4	4	5	3
492	27	M	A	5	2	5	5	2	3	4	4	5	5	4	3	4	5	4	5	5	3	4	2	5	4	4	2
493	27	F	A	4	2	5	4	2	4	3	4	5	4	3	4	3	3	3	4	5	3	5	2	4	4	4	4
494	27	F	NA	3	1	5	5	5	5	3	5	5	5	1	4	5	3	4	5	5	4	4	3	3	4	3	3
495	27	M	M	5	1	5	5	3	5	5	3	5	5	4	5	3	5	5	5	3	5	4	4	5	5	3	4
496	27	F	NM	3	2	5	5	2	3	3	3	4	5	4	5	5	5	1	5	5	5	5	3	5	5	4	3
497	27	F	NM	4	2	5	3	3	2	2	5	5	4	3	3	2	3	3	3	4	2	3	2	3	3	3	1
498	27	F	NM	5	1	5	5	1	5	5	3	5	5	5	5	3	5	3	5	5	5	4	4	5	5	5	5
499	27		NM	3	3	3	3	4	2	2	3	2	3	2	2	2	2	1	3	4	2	2	1	3	4	2	2
500	27	F	NA	3	1	5	5	2	5	2	4	5	5	4	5	5	5	2	5	5	5	1	1	5	5	4	4
501	28	F	A	4	1	5	4	1	4	4	3	5	4	5	3	3	3	3	4	5	4	3	2	3	3	4	2
502	28	F	A	4	1	5	5	5	5	3	4	5	5	1	3	2	5	5	5	5	3	4	4	5	5	2	2
503	28	F	A	5	2	5	5	4	4	5	5	5	5	2	5	3	5	5	5	3	5	5	4	5	5	3	3
504	28	M	A	5	4	5	5	1	3	5	5	5	5	5	5	4	5	5	5	5	5	5	2	5	5	5	5
505	28	M	M	4	1	5	5	2	4	4	3	4	5	4	4	5	3	5	5	4	5	4	2	5	5	4	5
506	28	F	M	5	1	5	5	2	5	4	4	5	5	4	4	3	3	4	5	5	4	4	3	2	5	3	4
507	28	M	NM	3	1	5	5	1	3	4	4	5	4	4	4	3	4	1	5	5	3	4	2	5	4	4	3
508	28	F	NM	4	1	5	4	2	4	3	4	5	4	3	3	1	3	1	4	4	3	3	1	4	4	3	3
509	28	M	NM	4	1	5	5	1	5	5	5	5	5	4	5	5	4	4	5	5	5	4	5	5	5	5	5
510	28		NM	5	1	5	5	1	4	5	3	4	5	5	4	5	5	3	5	5	2	3	2	4	5	3	2
511	28	M	NM	4	2	5	5	1	4	5	4	5	5	4	4	5	3	2	4	5	4	5	3	4	5	4	3
512	28	F	NA	4	2	5	5	3	2	3	3	5	4	3	4	3	5	2	4	4	5	4	1	4	5	3	4
513	29	M	A	4	1	5	4	1	5	4	5	5	4	4	4	4	3	3	4	2	4	3	2	4	4	4	2
514	29	M	A	4	2	5	5	2	5	4	4	5	4	3	4	3	5	4	4	4	3	4	2	5	5	4	2
515	29	F	A	4	1	5	5	1	5	5	5	5	5	5	5	3	5	2	5	5	5	4	3	4	5	3	4
516	29	F	A	3	1	5	4	1	3	4	2	5	4	4	3	2	4	3	4	5	3	3	2	4	4	4	2
517	29	F	A	3	4	5	4	1	4	4	3	5	4	4	3	3	4	5	4	5	4	4	3	4	4	4	3
518	29	F	A	4	2	5	4	1	5	4	5	5	5	5	4	4	5	5	4	5	5	3	4	5	5	4	4
519	29	F	A	4	1	5	1	1	5	4	5	5	5	4	5	2	5	5	4	5	4	5	4	5	4	3	5
520	29	M	M	5	1	4	5	2	4	3	5	4	4	3	3	3	2	4	4	5	2	3	2	2	4	4	1
521	29	M	M	5	4	5	5	3	5	5	5	5	4	3	5	3	5	5	4	5	5	5	4	5	5	4	5
522	29	F	M	4	2	5	5	2	4	5	4	5	4	3	3	4	4	5	5	5	1	4	5	4	5	4	3
523	29	F	NM	5	1	5	5	2	5	4	4	5	3	3	5	4	5	3	3	4	4	4	2	5	5	3	4
524	29	M	NM	2	4	5	2	4	4	3	3	5	3	3	4	3	5	1	3	4	3	4	1	4	3	3	3
525	29	F	NM	3	1	5	5	1	5	3	2	5	4	5	5	3	5	3	5	4	5	4	3	5	5	5	5
526	29	M	NM	4	2	4	5	1	4	4	4	4	5	5	5	5	1	3	4	4	4	4	4	4	4	5	2
527	29	F	NM	4	1	5	5	1	5	5	3	5	5	5	4	5	5	1	5	5	2	3	3	5	5	5	3
528	29	M	NM	4	2	5	4	2	4	3	5	5	5	4	5	3	2	1	5	5	4	4	1	4	4	4	4
529	29	F	NM	4	1	5	4	1	4	4	4	5	5	4	4	2	4	4	5	5	3	4	2	5	4	2	2
530	29	F	NM	4	3	5	4	1	5	3	4	5	4	5	4	3	4	5	4	5	4	5	2	5	4	5	4
531	30	F	A	3	2	5	4	1	3	4	4	4	3	4	3	2	2	2	3	3	3	2	2	4	4	5	4
532	30	M	A	5	1	5	5	1	4	4	5	5	5	5	4	5	4	4	4	4	4	4	5	5	5	4	3
533	30	M	A	4	1	5	5	5	5	4	5	5	3	2	4	4	4	5	2	4	2	4	3	4	4	4	2
534	30	M	A	5	1	5	4	2	5	4	5	5	5	4	5	3	5	5	5	5	5	5	5	5	5	5	5
535	30	M	NM	2	1	5	4	3	5	3	5	5	4	3	5	3	2	3	4	3	5	3	4	5	3	3	5
536	30	F	NM	5	2	5	4	1	5	5	2	5	5	5	5	2	5	4	5	5	5	5	5	5	5	5	5
537	31	F	NA	3	1	5	5	1	5	5	4	5	5	5	5	3	5	2	4	4	3	4	2	5	3	4	3
538	31	F	A	5	1	5	5	1	2	5	5	5	5	4	2	3	5	5	5	5	2	5	2	5	5	3	3
539	31	M	A	2	1	5	5	3	4	3	3	5	4	1	4	3	3	4	4	5	4	4	4	4	4	5	2
540	31	F	A	5	2	5	3	4	5	4	5	5	3	1	3	2	2	3	2	5	4	5	3	5	3	2	5
541	31	F	A	4	2	5	5	3	3	3	4	5	5	3	4	3	3	2	5	4	1	3	2	1	5	2	1
542	31	F	NM	5	3	5	5	1	5	4	5	5	5	5	5	3	4	3	5	5	3	5	2	4	5	5	4
543	31	F	NM	5	2	5	4	1	5	5	3	5	4	5	4	3	3	5	4	5	3	5	2	5	5	5	2
544	31	F	NM	3	4	5	4	2	4	3	4	5	4	3	3	3	5	4	4	4	4	4	3	3	4	4	3
545	31	F	NM	4	2	5	5	1	3	2	1	5	4	4	2	3	3	1	4	4	2	5	1	1	4	3	2
546	31	F	NM	4	3	5	5	4	2	2	5	5	5	3	5	4	2	1	5	3	2	4	1	4	5	2	1
547	31	F	NM	2	5	5	4	1	5	2	2	5	5	4	5	1	2	2	5	5	5	4	3	5	4	5	5
548	31	F	NM	4	3	5	3	2	3	4	4	4	4	4	4	2	4	2	4	4	1	2	3	4	4	2	4
549	31	M	NM	4	2	5	4	1	5	4	4	5	5	4	4	5	4	4	5	5	4	5	3	5	5	5	3
550	31	F	NA	4	1	4	4	1	3	4	5	4	5	5	4	4	2	2	4	5	4	4	3	3	4	5	5
551	32	F	A	5	1	5	5	1	5	5	5	5	5	5	5	3	5	2	5	5	5	5	3	5	5	5	5
552	32	F	A	5	2	4	5	1	4	4	5	5	5	4	4	2	4	2	4	5	2	5	3	4	5	3	2
553	32	M	A	4	2	5	5	2	5	4	5	5	4	4	5	5	4	4	4	4	5	3	2	4	4	4	4
554	32	M	A	5	3	5	4	3	4	4	3	5	5	4	4	4	5	3	4	5	4	4	3	5	4	4	3
555	32	M	M	5	1	5	4	3	5	3	4	5	3	3	4	3	5	5	3	4	5	4	5	4	3	3	5
556	32	M	M	5	3	4	1	1	5	5	4	5	2	3	5	3	1	5	3	2	4	4	5	5	5	3	3
557	32	F	M	4	2	5	1	3	5	5	5	5	3	3	5	4	5	5	4	5	5	4	5	5	5	5	5
558	32	F	NM	4	5	5	5	1	4	4	4	5	5	5	4	3	5	2	5	4	4	3	1	4	5	4	3
559	32	M	NM	3	3	5	2	1	3	4	4	5	4	3	4	3	5	2	4	5	2	3	2	5	3	3	1
560	32	M	NM	4	3	5	4	1	4	5	4	5	4	5	4	2	5	1	4	4	4	4	1	5	3	5	3
561	32	M	NM	5	1	5	3	3	5	4	3	5	5	3	3	4	2	2	5	4	4	2	2	4	4	3	2
562	32	F	NA	4	1	5	5	1	4	4	4	5	5	5	3	3	4	3	5	4	3	3	1	4	5	4	2
563	33	F	A	4	2	5	4	2	2	2	4	5	5	4	4	2	5	2	5	5	4	4	4	5	5	4	4
564	33	F	A	3	2	5	4	3	4	4	4	5	4	4	5	4	4	5	5	5	5	4	5	5	5	3	4
565	33	F	A	3	3	4	3	5	3	2	3	3	5	2	4	2	4	2	4	4	3	5	2	4	4	3	3
566	33	M	A	5	1	5	5	5	5	5	5	5	5	2	4	3	1	3	5	3	4	4	4	5	5	1	5
567	33	M	A	4	2	4	4	1	4	3	3	4	4	4	4	4	2	3	4	5	3	4	3	4	4	3	3
568	33	M	A	4	1	5	3	4	3	4	5	4	5	4	3	4	2	5	5	5	3	4	3	4	5	3	2
569	33	F	M	4	1	5	5	1	5	5	4	5	3	3	5	4	5	5	3	3	5	3	3	5	5	4	4
570	33	M	M	4	1	5	5	1	4	4	4	5	5	5	4	3	5	5	4	5	3	3	4	4	4	4	1
571	33	F	M	5	1	5	5	1	5	5	5	5	3	3	5	5	5	5	4	5	5	5	5	5	5	5	5
572	33	M	M	3	1	5	3	2	4	2	5	5	2	3	4	2	4	4	2	4	5	4	2	5	3	2	2
573	33	F	NM	4	1	5	5	1	5	5	5	5	5	5	4	4	3	1	5	5	3	4	3	4	5	5	4
574	33	M	NM	3	1	5	4	2	3	5	3	5	4	4	3	2	5	1	3	4	3	5	2	5	4	4	4
575	33	F	NM	3	1	5	5	1	4	3	3	5	5	4	4	3	4	1	4	4	3	3	3	3	5	4	1
576	33	F	NM	5	2	5	5	3	3	3	4	5	3	2	3	1	3	3	3	4	2	4	1	3	3	3	1
577	33	F	NM	3	1	5	5	1	5	5	5	5	3	4	4	3	2	1	4	3	2	4	1	2	4	4	3
578	33	M	NM	2	1	5	4	1	4	2	2	5	4	5	3	3	4	1	3	1	2	2	2	3	4	5	5
579	33	F	NM	5	4	5	2	2	3	2	4	5	4	4	4	2	5	2	4	3	3	3	1	5	4	4	4
580	33	F	NM	4	2	5	4	1	5	5	4	5	5	5	4	3	4	3	4	4	3	4	3	5	5	5	2
581	33	F	NM	5	1	5	5	3	4	5	3	4	4	3	2	3	1	1	4	5	3	4	3	4	4	4	2
582	33	F	NM	4	2	5	5	1	5	4	2	5	4	5	4	3	4	1	4	5	4	4	2	5	4	5	5
583	34	F	A	3	1	5	5	1	4	3	4	5	4	5	3	4	5	3	4	4	3	5	3	5	4	4	3
584	34	M	A	4	1	5	5	4	4	5	5	5	5	2	3	4	4	5	5	4	3	3	5	5	5	2	2
585	34	M	A	4	1	5	4	1	5	3	5	5	3	5	5	5	5	3	3	3	5	3	4	5	3	5	4
586	34	M	NM	4	4	5	3	4	4	3	4	4	4	3	4	1	3	2	3	3	3	4	3	4	3	3	2
587	34	F	NM	2	2	5	5	1	4	3	5	5	3	5	4	5	5	3	3	5	4	4	2	4	5	5	4
588	34	M	NM	5	1	5	5	2	5	4	3	5	5	4	5	4	5	2	5	2	5	3	2	5	5	4	4
589	34	F	NM	4	1	5	4	1	4	4	5	5	5	5	3	5	5	3	5	5	3	4	4	2	5	4	2
590	34	F	NM	5	1	5	5	1	5	4	5	5	5	5	4	3	4	1	5	4	5	4	4	5	5	4	3
591	34	F	NM	4	1	5	5	1	5	5	5	5	5	5	5	3	5	4	5	5	4	4	2	5	5	5	4
592	35	M	A	4	1	5	5	2	4	3	4	5	5	3	3	2	1	3	4	3	3	4	2	4	4	3	3
593	35	M	A	4	1	5	5	1	5	5	5	5	5	5	5	5	4	5	5	5	5	3	5	4	5	3	5
594	35	F	A	4	1	5	5	4	5	5	4	5	5	3	4	4	4	5	5	5	5	4	3	3	5	4	4
595	35	F	A	4	2	5	5	2	4	4	4	5	4	4	4	3	4	3	4	4	3	3	3	5	4	4	3
596	35	F	A	2	2	5	5	5	4	3	3	5	4	2	3	4	4	1	4	4	4	4	2	4	5	2	3
597	35	M	A	4	1	5	5	4	4	5	5	4	4	2	4	5	3	4	4	4	4	4	5	4	4	4	4
598	35	M	A	3	1	5	5	1	4	5	4	5	5	5	4	5	5	5	5	5	4	4	4	5	4	5	4
599	35	F	A	4	3	5	3	3	2	4	4	5	4	3	2	1	5	3	4	4	2	3	1	5	4	4	2
600	35	M	M	5	3	5	3	1	5	5	5	5	3	4	4	5	5	3	3	2	5	3	5	5	4	4	2
601	35	M	M	4	4	4	3	5	2	4	4	4	3	1	3	1	4	5	3	4	2	2	4	3	4	1	2
602	35	F	NM	3	3	4	3	1	2	3	2	3	2	3	2	2	2	4	3	4	1	4	4	2	3	3	1
603	35	M	NM	4	1	5	5	1	5	4	5	5	4	4	5	5	4	3	4	4	4	4	3	4	5	4	2
604	35	M	NM	5	2	5	5	1	4	5	3	5	5	5	3	5	2	3	5	5	3	3	3	4	4	4	2
605	35	F	NM	4	4	5	2	1	3	3	4	4	3	4	2	1	1	5	3	5	2	2	2	4	1	4	1
606	35	M	NM	4	2	5	4	1	5	5	5	5	5	5	5	5	3	3	4	4	4	4	1	4	4	2	3
607	35	F	NM	3	3	5	2	1	2	1	2	5	3	3	1	1	5	1	3	5	1	1	1	3	4	4	2
608	35		NM	3	3	3	3	2	3	3	2	3	4	3	2	2	2	2	4	2	2	2	1	3	3	2	2
609	35	F	NM	5	4	5	4	1	3	3	3	5	4	4	4	1	5	2	3	3	5	3	1	5	5	4	3
610	35	M	NM	5	1	5	5	1	5	4	5	5	5	5	5	3	4	4	5	4	4	2	3	5	5	5	4
611	35	F	NM	4	1	5	5	1	4	4	3	5	5	4	4	2	5	5	5	5	3	4	1	5	5	5	2
612	36	F	A	5	1	5	4	2	4	5	5	5	5	5	3	5	5	3	5	5	3	3	2	4	5	5	3
613	36	F	A	4	1	5	5	1	3	3	4	5	5	5	4	3	4	4	5	4	3	3	1	4	5	5	3
614	36	M	A	4	1	5	5	1	5	4	5	5	5	5	4	5	5	5	5	5	5	5	4	5	5	5	5
615	36	M	A	4	1	4	5	1	3	4	5	4	4	3	2	5	1	5	4	4	2	4	3	5	4	3	2
616	36	M	M	5	5	5	4	1	5	5	5	4	4	3	3	5	3	5	4	4	3	4	5	4	5	4	1
617	36	F	NM	5	5	5	3	2	5	3	4	5	2	4	1	1	1	1	2	5	1	5	1	2	4	4	1
618	36	F	NM	4	1	5	4	2	5	1	2	5	4	2	3	4	5	4	4	4	4	5	4	4	5	1	3
619	36	F	NM	3	2	5	3	1	2	3	1	5	4	4	2	1	4	2	4	4	3	4	1	4	4	4	3
620	37	F	A	4	2	5	4	1	5	4	3	5	4	4	4	3	5	5	4	5	4	3	2	5	4	4	4
621	37	F	A	5	1	5	5	3	5	5	5	5	5	3	5	3	5	3	5	4	5	3	5	5	5	3	5
622	37	M	A	5	2	5	5	1	5	4	4	5	2	5	4	3	4	4	2	5	4	4	2	5	3	4	3
623	37	F	A	4	1	5	5	2	4	4	5	5	5	4	4	3	5	3	4	5	5	5	4	5	5	4	4
624	37	M	A	3	2	5	4	2	5	4	5	5	4	4	4	4	2	2	4	4	3	4	4	4	4	3	4
625	37	F	NM	5	2	5	5	2	5	2	4	5	3	3	2	1	5	3	2	5	3	4	3	5	4	3	2
626	37	F	NM	4	1	4	5	2	5	4	4	4	4	2	5	4	4	3	4	3	4	3	3	4	4	3	5
627	37	F	NM	4	3	5	4	2	2	3	1	5	4	4	2	2	4	2	3	4	2	4	1	4	3	3	2
628	37	M	NM	3	4	4	3	4	2	2	2	4	4	3	2	2	2	1	2	3	2	3	1	3	3	3	3
629	37	F	NM	4	3	5	4	1	3	3	3	5	3	5	2	2	5	3	3	5	3	3	2	4	4	4	2
630	37	M	NM	5	2	5	5	2	4	4	4	5	4	4	3	2	4	2	4	5	4	4	3	5	4	4	4
631	38	F	A	4	2	5	4	1	4	5	5	5	4	5	4	3	5	4	4	5	4	4	3	5	4	5	4
632	38	F	A	4	4	5	3	5	3	3	4	5	4	3	2	1	3	5	4	4	1	2	1	4	4	3	1
633	38	M	M	5	1	5	5	5	5	5	5	5	5	1	5	5	5	5	5	5	5	5	5	5	5	5	5
634	38	M	NM	4	2	5	5	4	3	4	2	5	5	1	2	3	1	1	4	4	3	4	1	2	4	1	1
635	38	F	NM	5	1	5	5	1	5	5	5	5	5	5	5	5	5	4	5	3	5	4	2	5	5	5	5
636	38	F	NM	4	2	5	4	1	4	3	3	5	4	5	3	3	5	1	5	3	2	4	3	5	5	4	3
637	38	F	NM	5	2	5	5	1	4	4	3	4	4	4	4	3	2	1	4	4	4	4	3	4	4	4	4
638	38	F	NM	4	3	5	2	1	4	4	5	5	4	5	3	1	5	4	4	5	3	4	1	4	4	5	4
639	38	F		3	2	5	4	2	5	5	4	5	5	4	5	4	5	4	5	5	5	4	1	5	4	5	5
640	39	M	A	4	2	5	2	2	4	3	3	4	4	3	2	2	2	2	4	4	3	3	1	5	4	2	2
641	39	F	A	5	1	5	4	1	5	5	5	5	5	5	5	4	5	5	5	5	5	5	4	5	5	4	4
642	39	F	A	5	4	5	4	1	3	3	2	5	4	5	4	2	5	5	4	4	3	4	4	5	5	5	4
643	39	F	M	2	1	5	1	1	2	3	3	5	3	3	2	1	5	1	2	3	1	1	4	3	4	3	1
644	39	F	NM	5	2	5	5	1	4	5	5	5	5	5	3	2	5	1	5	5	1	5	1	5	5	5	3
645	39	M	NM	5	1	5	4	2	5	3	4	5	5	4	4	3	4	2	4	4	4	4	2	4	4	4	5
646	39	F	NM	4	3	5	4	1	5	4	3	5	4	5	4	4	5	4	4	5	5	4	2	5	4	5	4
647	39	F	NM	4	2	5	4	1	4	4	4	5	4	4	4	3	4	2	4	4	3	4	3	4	4	3	2
648	39	F	NM	2	4	3	2	3	1	2	4	2	2	2	1	1	2	1	2	3	1	3	3	2	3	3	2
649	39	F	NM	4	3	4	4	2	3	3	2	4	3	3	2	2	2	2	2	3	2	4	2	3	2	3	3
650	40	F	A	4	1	4	5	1	3	3	3	4	3	4	3	4	2	3	4	4	2	4	3	3	4	4	3
651	40	M	A	5	1	5	5	1	5	3	5	5	4	3	5	4	5	3	4	4	5	3	5	5	5	5	5
652	40	M	A	5	2	5	3	4	5	5	5	5	5	1	5	4	5	5	5	5	5	5	4	5	5	2	5
653	40	F	A	4	2	4	4	1	4	4	4	4	5	5	4	3	2	4	4	3	4	3	3	3	5	4	5
654	40	F	M	3	1	5	5	3	5	5	5	5	5	3	4	3	5	5	5	5	4	4	3	5	5	4	4
655	40		NM	5	2	5	5	1	5	4	5	5	5	5	5	3	5	4	3	5	5	4	2	5	5	4	5
656	40	M	NM	4	1	5	5	1	4	5	4	4	4	4	4	3	1	2	4	3	3	4	2	3	4	4	4
657	40	F	NM	4	3	5	4	2	3	3	3	5	5	4	3	3	4	1	4	3	2	3	1	4	4	3	2
658	40	M	NM	3	2	5	3	2	4	4	5	4	4	3	3	3	1	3	4	5	2	4	2	3	4	3	4
659	41	F	NA	5	3	5	3	1	5	5	5	5	5	5	4	3	5	4	5	4	5	4	2	5	5	4	4
660	41	M	A	2	2	5	4	1	4	4	5	5	3	5	5	3	3	4	3	5	4	4	2	5	4	4	3
661	41	F	A	4	3	5	4	2	4	4	4	4	4	4	4	3	5	3	4	5	3	4	3	4	4	4	3
662	41	M	A	2	2	5	3	4	2	1	3	5	4	1	2	4	5	1	3	4	2	1	1	4	1	2	1
663	41	F	A	4	1	5	5	1	5	4	3	5	5	4	4	3	5	5	5	3	2	4	2	5	5	3	3
664	41	M	M	2	1	5	5	5	5	4	5	5	5	3	5	5	3	5	5	5	5	3	5	5	5	4	3
665	41	F	M	5	2	5	5	1	5	5	5	5	5	5	5	3	5	5	5	5	5	4	4	5	5	5	5
666	41	M	M	4	1	5	4	2	4	4	5	5	4	2	3	2	2	5	4	4	3	3	5	4	4	3	3
667	41	F	M	5	1	5	5	1	5	5	5	5	4	4	5	5	5	5	5	5	5	4	5	5	5	5	4
668	41	F	NM	4	2	5	3	1	3	4	4	5	5	4	5	3	5	2	5	4	4	2	2	4	5	4	5
669	41	M	NM	5	1	5	5	3	4	4	4	5	5	4	3	2	4	2	5	4	4	5	4	5	4	3	2
670	41	M	NM	4	1	5	4	2	4	4	4	3	3	3	4	3	3	2	4	2	4	2	2	3	5	3	4
671	41	F	NM	4	1	5	5	2	5	4	5	5	5	4	4	4	4	3	5	5	4	4	3	5	5	4	3
672	41	F	NM	3	1	5	5	1	5	5	4	5	5	5	5	3	5	1	5	4	4	4	2	4	5	4	4
673	41	F	NM	4	3	4	4	1	3	3	3	4	4	4	3	2	4	2	4	4	2	4	1	4	4	4	3
674	42	F	A	5	5	5	5	1	5	5	5	5	5	5	5	5	4	5	5	5	5	5	3	5	5	5	5
675	42	F	A	5	1	5	5	5	5	4	5	5	5	2	4	5	5	5	5	4	5	3	3	5	5	2	4
676	42	F	A	4	1	5	3	3	4	2	3	5	5	4	4	3	3	1	4	3	4	4	4	3	5	3	5
677	42	M	A	5	1	5	5	1	5	4	5	5	5	5	2	5	5	5	5	5	4	4	5	5	5	4	4
678	42	F	A	5	1	5	5	1	5	5	5	5	5	5	4	4	4	4	5	5	5	5	3	5	5	5	5
679	42	M	M	4	1	5	5	1	5	5	5	5	5	5	5	3	5	5	5	5	4	4	5	4	5	5	5
680	42	M	NM	4	3	5	3	2	1	2	2	5	3	3	2	1	5	1	2	5	1	4	2	5	2	5	1
681	42	F	NM	4	2	5	5	1	5	4	5	5	4	5	5	4	5	3	4	4	5	4	4	5	4	4	5
682	42	M	NM	5	1	5	4	2	3	4	4	5	3	4	2	4	1	1	4	4	1	3	2	4	3	4	1
683	42	F	NM	4	5	5	3	1	4	2	4	5	4	3	5	2	5	1	3	4	5	4	1	4	4	4	5
684	42	F	NM	5	1	4	5	4	4	5	5	5	3	1	3	5	4	3	3	4	4	3	4	5	5	2	1
685	42	M	NM	3	1	5	5	1	4	5	5	5	4	4	3	5	5	4	5	5	3	3	4	5	5	5	3
686	42	F	NM	4	2	5	4	1	5	4	4	5	4	4	4	3	5	5	4	5	4	4	3	5	4	4	4
687	42	M	NM	3	1	4	4	1	2	3	5	4	4	3	3	3	1	1	4	4	3	3	2	4	4	3	1
688	42	F	NA	5	5	5	5	1	5	5	5	5	5	5	5	5	5	4	5	5	5	5	3	5	5	5	5
689	43	F	A	5	3	5	5	1	5	5	5	5	5	4	5	2	5	5	5	5	5	5	4	5	5	2	5
690	43	F	M	5	3	5	3	1	4	5	2	5	5	5	4	2	5	5	5	3	3	4	3	5	5	5	4
691	43	F	NA	5	1	5	5	1	5	5	5	5	5	5	4	4	5	2	5	5	5	5	4	5	5	5	5
692	43	F	NM	1	3	4	3	4	1	1	2	4	3	3	1	1	2	1	3	5	2	4	2	2	4	4	4
693	43	M	NM	4	2	5	5	1	2	4	3	5	4	4	3	3	5	1	4	5	2	4	1	4	5	3	2
694	43	M	NM	4	2	5	5	1	5	4	4	5	5	4	4	3	2	2	5	5	4	4	4	4	4	4	3
695	43	M	NM	3	1	5	5	1	4	4	5	5	5	5	2	5	2	3	5	4	2	4	3	5	5	4	4
696	44	M	A	5	1	5	5	3	5	4	5	5	5	3	5	5	5	4	5	5	5	3	5	5	5	5	5
697	44	F	A	5	2	5	5	1	5	5	5	5	5	5	5	4	5	4	5	5	4	5	3	5	5	5	5
698	44	M	A	4	1	5	5	1	4	4	5	5	4	4	3	4	4	4	5	4	4	5	3	3	4	2	2
699	44	F	NM	3	4	5	4	1	3	5	4	5	3	5	1	3	2	2	3	3	2	2	2	5	4	4	2
700	44	F	NM	5	2	5	4	2	4	3	4	5	3	3	4	3	2	3	3	3	3	4	3	4	4	3	3
701	44	F	NM	4	3	5	3	1	3	3	3	5	3	5	3	1	5	3	3	5	2	3	1	5	4	5	4
702	44	F	NM	2	5	4	5	2	3	2	5	4	5	4	2	3	1	2	4	3	2	2	3	2	4	3	3
703	44	F	NM	4	3	5	3	2	3	2	2	5	4	3	2	2	4	2	4	4	2	2	2	4	3	3	1
704	44	F	NM	5	3	5	4	1	4	5	5	5	5	4	4	4	2	5	4	5	3	5	5	5	3	4	4
705	44	M	NM	5	1	5	5	4	5	3	5	5	5	5	5	5	2	1	5	1	5	5	5	5	5	5	4
706	44	F	NM	2	4	4	2	1	1	1	5	5	3	4	3	3	1	2	3	3	3	3	1	3	4	3	2
707	44	F	NM	5	1	5	5	1	4	4	5	5	5	4	4	3	5	3	5	5	5	5	4	5	5	3	5
708	45	F	A	5	1	5	5	1	5	5	5	5	5	5	5	3	4	5	5	5	4	5	5	5	5	4	4
709	45	M	A	5	1	5	4	5	5	5	5	5	5	3	4	5	5	5	4	4	5	5	3	4	5	3	4
710	45	M	A	4	1	5	4	1	5	5	5	5	4	4	3	4	3	5	5	5	5	5	5	5	5	3	5
711	45	M	A	4	2	5	3	1	4	4	5	5	4	3	4	3	5	3	4	4	4	4	3	5	4	3	2
712	45	F	M	5	3	5	5	1	5	5	5	5	4	5	4	2	5	5	5	2	4	4	3	5	5	5	3
713	45	F	M	5	3	5	3	1	5	5	4	5	4	5	4	2	5	5	4	3	5	4	4	5	4	5	4
714	45	M	M	4	1	5	1	3	5	5	5	5	5	3	5	5	5	5	5	3	5	5	5	5	5	3	3
715	45	F	NM	3	1	5	5	1	4	4	5	5	4	4	3	5	3	1	4	3	3	4	2	3	4	3	4
716	45	F	NM	5	2	5	4	1	5	4	5	5	4	5	5	3	4	1	4	4	5	5	3	5	5	5	5
717	45	F	NM	5	4	5	3	1	2	3	2	5	4	5	4	2	5	2	4	5	2	1	1	3	3	5	3
718	45	F	NM	4	3	4	3	1	3	3	3	4	4	3	3	2	3	1	4	2	2	3	2	4	4	3	2
719	45	M	NM	4	3	5	4	3	3	3	4	5	4	4	3	4	4	4	4	5	3	4	2	3	4	4	3
720	46	F	A	5	2	5	5	2	4	4	4	5	5	4	4	3	5	3	5	4	4	4	3	5	4	5	5
721	46	M	A	5	1	5	5	4	5	4	5	5	5	3	5	5	5	4	5	4	5	5	4	5	5	3	3
722	46	M	A	5	1	5	5	1	5	5	5	5	5	5	5	5	5	5	5	5	5	5	5	5	5	5	5
723	46	M	NM	3	1	5	5	1	4	4	5	5	4	4	4	4	4	4	4	4	4	4	3	4	4	4	4
724	46	F	NM	4	2	5	5	1	3	3	4	5	4	3	4	3	3	1	4	1	3	4	3	3	3	4	2
725	46	M	NM	5	1	5	5	4	3	4	5	5	3	2	3	5	4	3	3	4	3	4	4	4	4	3	3
726	46	F	NM	4	4	5	4	1	5	4	5	5	5	4	5	3	5	3	5	4	5	4	1	5	5	2	4
727	46	M	NM	3	1	4	5	3	5	5	5	4	5	3	5	5	4	3	5	2	5	3	5	4	5	3	5
728	46	F	NM	3	3	5	4	1	2	3	4	5	4	4	3	2	4	4	5	5	4	3	2	1	5	2	3
729	46	F	NM	3	2	5	4	1	4	4	3	5	4	4	3	3	5	4	4	5	3	4	4	5	5	4	3
730	46	F	NM	5	1	5	5	1	4	5	5	5	5	5	3	4	4	1	5	5	5	5	4	3	3	4	1
731	46	F	NM	4	2	5	4	3	4	3	3	5	4	4	2	1	4	2	4	5	3	4	1	4	4	4	4
732	46	M	NM	4	3	5	4	2	4	4	4	5	4	4	4	3	4	2	4	4	3	4	3	4	4	4	4
733	46	F	NA	4	4	5	4	4	5	4	4	5	5	4	3	3	2	3	5	3	3	4	3	5	4	3	3
734	47	M	A	4	1	5	4	5	3	3	4	5	5	3	3	3	4	1	4	3	4	4	3	5	4	3	3
735	47	F	A	5	1	5	5	1	5	5	5	5	2	5	4	5	5	5	1	5	5	5	5	5	5	5	5
736	47	M	A	3	4	5	3	5	3	3	4	4	4	1	3	1	4	1	3	2	1	3	1	4	3	1	2
737	47	M	A	4	1	5	4	1	3	4	5	5	5	4	4	4	3	5	4	4	3	4	5	3	5	3	3
738	47	M	A	5	1	5	5	3	5	5	5	5	5	2	5	4	5	5	5	5	5	5	5	5	5	2	3
739	47	M	M	5	2	5	5	5	5	5	5	5	5	1	4	4	5	5	5	3	3	3	5	4	5	3	3
740	47	M	M	5	1	5	5	2	5	5	5	5	3	3	5	5	3	5	4	1	5	3	5	4	5	3	4
741	47	F	NM	4	3	5	3	4	2	2	2	5	4	2	2	1	2	1	4	5	2	4	1	3	4	2	2
742	47	F	NM	5	4	5	2	5	5	3	1	5	4	4	4	1	5	1	3	5	4	4	1	3	3	5	2
743	47	F	NM	5	2	5	4	3	4	4	4	4	4	3	4	3	4	4	4	4	3	4	2	4	4	3	4
744	47		NM	4	3	5	4	2	4	4	4	5	4	4	4	3	5	3	4	4	3	4	3	5	4	5	4
745	47	F	NM	5	1	5	5	1	5	5	5	5	5	5	5	5	5	5	5	5	5	5	4	5	5	5	5
746	47	F	NM	3	2	5	4	1	4	3	4	5	4	4	3	1	5	2	4	3	3	4	4	4	4	4	3
747	47	F	NM	4	3	5	3	3	2	4	2	4	3	3	3	2	2	2	3	5	3	3	2	4	2	3	4
748	47	M	NM	5	2	5	4	2	4	5	5	5	4	4	5	5	5	3	4	5	5	5	2	5	4	5	5
749	48	F	A	4	4	4	4	1	2	2	4	5	4	5	4	4	3	3	4	5	3	4	4	3	4	5	4
750	48	F	A	4	3	5	3	5	4	2	4	5	5	1	3	2	4	1	4	2	1	3	1	4	3	1	4
751	48	M	A	4	3	5	3	3	3	4	5	5	4	3	2	2	5	3	4	3	2	3	1	4	4	3	2
752	48	M	NM	4	3	5	3	4	2	2	4	5	4	4	3	4	3	2	3	3	3	2	1	4	3	4	4
753	48	M	NM	4	2	5	4	4	4	3	3	4	5	2	2	3	1	2	5	5	2	3	1	5	4	4	1
754	48	M	NM	4	1	4	5	4	2	3	5	4	4	3	2	3	2	1	4	4	1	3	2	4	4	3	1
755	48	F	NM	5	1	5	5	1	5	5	5	5	5	5	5	5	5	1	5	5	5	4	1	5	5	5	5
756	48	F	NM	5	2	5	4	1	5	5	4	5	4	5	4	1	4	5	4	5	4	5	2	5	5	5	5
757	49	F	A	5	2	5	5	1	5	4	4	5	5	3	4	3	5	4	4	3	5	4	4	4	5	2	4
758	49	F	A	5	1	5	5	2	5	4	4	5	4	3	4	3	4	4	4	2	4	4	4	5	5	2	4
759	49	F	A	5	1	5	5	1	5	5	5	5	5	5	5	5	5	5	5	5	5	5	5	5	5	5	5
760	49	F	A	3	1	5	5	3	4	5	5	5	5	3	4	4	3	4	5	4	4	5	2	4	5	3	5
761	49	F	A	5	1	5	5	1	4	5	5	5	5	5	4	4	5	5	5	5	4	5	5	5	5	5	4
762	49	F	A	4	1	5	4	4	5	3	4	4	4	3	4	3	3	3	4	3	4	5	4	4	4	3	3
763	49	M	A	4	4	4	4	2	4	2	5	4	4	2	2	4	2	4	4	4	2	2	1	1	2	2	1
764	49	F	NM	2	4	5	3	1	2	2	4	4	3	4	2	2	2	3	3	2	1	5	1	1	3	2	1
765	49	M	NM	4	1	5	4	4	4	4	5	5	4	4	4	4	3	4	4	5	4	5	3	4	4	5	5
766	49	F	NM	5	2	5	4	1	5	5	5	5	4	5	5	3	5	4	5	4	5	5	4	5	4	5	5
767	49	F	NM	3	4	5	3	3	3	4	4	5	3	2	2	2	3	4	3	4	1	3	1	4	4	2	2
768	49	F	NM	4	2	5	5	1	4	3	5	5	4	5	5	3	5	4	4	5	5	4	3	5	4	4	4
769	50	M	A	4	1	5	5	3	5	4	5	5	5	3	4	5	5	2	5	5	5	4	5	5	5	3	4
770	50	F	A	3	2	5	3	1	5	3	5	5	5	5	5	2	5	4	3	5	5	4	2	5	5	5	3
771	50	F	A	3	2	5	5	1	5	4	5	5	5	3	5	4	5	3	5	5	5	5	1	5	5	5	5
772	50	M	A	4	2	5	4	1	5	4	4	5	3	3	4	4	3	5	3	5	4	4	3	4	3	4	4
773	50	M	A	5	2	5	4	1	5	4	5	5	3	3	5	4	5	5	3	4	5	4	3	5	4	4	4
774	50	F	A	5	1	5	4	2	4	5	5	5	5	5	4	5	5	4	5	5	5	5	4	5	5	5	5
775	50	F	A	4	1	5	4	2	5	3	4	5	5	4	5	3	5	4	5	4	5	4	3	4	5	4	3
776	50	F	A	5	1	5	5	5	4	4	2	5	5	1	3	2	2	3	5	5	3	4	3	4	5	4	4
777	50	F	A	5	1	5	5	1	5	5	5	5	5	5	5	5	5	4	5	5	5	5	3	5	5	4	5
778	50	F	A	4	1	5	5	1	5	5	5	5	5	5	5	3	4	4	5	5	3	3	3	4	5	5	4
779	50	M	M	4	1	5	4	2	4	5	5	5	4	2	3	4	5	4	4	2	3	2	5	4	5	2	3
780	50	F	NM	3	3	5	5	1	5	3	5	5	5	5	5	2	5	1	5	5	5	5	2	5	5	4	5
781	50	F	NM	4	3	5	4	1	4	4	4	5	4	4	3	2	4	4	4	3	4	4	2	4	4	3	4
782	50	F	NM	3	4	5	4	2	4	2	4	5	5	3	4	1	1	1	4	5	5	3	4	4	5	3	4
783	50	M	NM	2	2	4	4	5	4	4	4	4	4	1	4	3	2	1	5	2	3	2	2	2	4	2	2
784	50	F	NM	3	1	5	5	1	5	4	5	5	5	4	4	4	5	3	5	5	5	5	3	5	5	5	5
785	50	M	NM	2	1	5	5	4	5	1	4	5	5	1	2	2	5	1	5	2	4	4	1	5	5	1	2
786	50	F	NM	5	1	5	5	1	5	5	5	5	5	5	5	4	3	4	5	4	5	4	3	4	5	3	4
787	50	F	NM	5	1	5	5	1	5	5	5	5	4	4	4	5	5	4	4	5	4	5	3	4	5	5	4
788	51	M	A	4	1	5	4	4	4	5	5	5	5	2	5	5	3	5	5	5	4	5	5	5	5	3	3
789	51	F	A	3	1	5	5	1	4	5	5	5	5	4	5	4	5	4	5	5	5	5	5	5	5	5	4
790	51	M	A	5	4	5	5	3	3	4	5	5	4	2	3	3	5	1	3	4	3	4	3	5	4	4	3
791	51	M	A	3	1	5	4	5	2	2	5	5	5	1	3	4	4	4	5	4	2	3	1	4	4	2	1
792	51	M	M	5	1	5	5	1	5	5	5	5	5	3	4	4	5	5	5	5	5	5	4	5	5	5	3
793	51	M	M	3	1	4	4	5	4	4	4	4	4	1	3	4	1	5	3	1	4	4	4	4	4	1	2
794	51	F	NM	3	2	4	2	5	2	3	4	4	4	2	2	3	4	3	4	4	4	3	2	5	2	3	2
795	51	F	NM	3	1	5	5	3	5	5	5	5	5	1	5	1	5	1	5	3	5	1	1	5	5	1	5
796	51	F	NM	4	2	5	3	1	3	3	4	5	5	4	5	3	5	2	5	5	4	4	3	4	4	4	5
797	51	M	NM	2	5	3	2	2	2	2	1	3	3	2	2	2	2	2	2	2	1	2	1	2	2	2	1
798	51	M	NM	4	2	5	5	5	4	3	4	5	5	1	4	3	3	1	5	3	4	4	2	4	5	2	3
799	51	F	NM	4	2	5	3	1	5	4	4	5	4	5	4	3	5	2	3	4	5	5	3	4	5	5	5
800	51	F	NM	4	1	5	5	1	4	4	4	5	5	4	4	3	5	3	5	5	4	5	2	5	5	4	4
801	52	M	A	2	1	5	5	4	5	3	5	5	5	2	5	4	4	1	5	2	5	4	3	4	5	2	4
802	52	M	A	4	4	5	4	2	5	1	5	5	3	4	5	5	3	5	3	5	5	4	3	5	5	5	5
803	52	F	A	5	2	5	5	1	5	5	5	5	4	4	5	4	5	5	5	4	5	5	4	5	5	3	5
804	52	M	A	4	1	5	5	3	5	5	4	5	4	3	5	2	5	3	4	4	5	5	3	5	5	4	5
805	52	M	A	5	3	5	4	1	5	4	5	5	4	5	5	5	5	5	4	4	4	4	3	5	4	5	5
806	52	M	A	3	2	5	4	5	5	4	5	5	4	1	5	4	5	5	4	1	4	5	4	5	5	5	3
807	52	F	M	5	3	5	2	1	4	5	4	5	3	5	3	5	2	5	3	5	2	3	3	5	2	3	3
808	52	M	NM	4	2	5	5	5	4	4	2	5	4	1	4	2	4	1	4	3	4	4	2	4	4	2	4
809	52	F	NM	4	1	5	5	1	5	5	5	5	5	5	5	3	5	5	5	5	5	4	3	5	5	5	5
810	52	M	NM	2	4	4	2	4	3	3	2	4	4	3	3	1	1	1	4	4	3	3	3	3	3	3	1
811	52	F	NM	5	5	5	1	1	1	3	3	4	4	5	3	1	3	3	3	5	1	3	1	3	3	5	1
812	52	F	NM	5	1	5	5	1	5	4	5	5	5	5	4	4	5	3	5	4	4	4	3	5	5	4	4
813	52	M	NM	5	1	5	5	1	3	4	5	5	5	3	5	4	5	1	5	5	4	5	4	5	5	4	3
814	53	M	A	4	4	5	5	4	5	2	5	5	4	2	5	4	4	4	4	2	5	4	3	5	4	4	5
815	53	F	A	5	2	5	5	1	5	5	5	5	5	5	5	4	5	5	5	5	5	5	4	5	5	5	5
816	53	F	A	5	2	5	5	2	5	3	5	5	5	5	4	5	5	5	5	5	5	5	3	5	5	5	5
817	53	M	A	1	2	5	3	3	5	2	5	5	5	3	3	1	5	5	3	4	5	4	2	3	4	3	4
818	53	F	A	3	1	5	5	1	5	4	4	5	5	5	5	3	5	2	5	5	5	4	3	4	5	5	4
819	53	F	A	4	2	5	5	1	5	5	5	5	5	5	4	5	5	3	5	5	4	4	3	5	5	5	5
820	53	F	A	3	2	5	4	1	3	4	3	5	4	4	3	3	5	4	4	4	4	4	3	4	4	3	3
821	53	F	A	3	2	5	4	1	5	5	5	5	5	5	5	3	5	5	5	5	5	3	3	5	4	5	5
822	53	M	NM	3	3	5	4	1	4	4	5	5	4	5	4	4	2	3	4	4	3	4	2	5	4	4	5
823	53	F	NM	4	3	5	4	1	4	4	2	5	4	4	3	2	5	1	4	1	4	3	2	4	4	3	3
824	53	F	NM	4	2	5	5	1	5	4	4	5	5	4	4	4	4	3	5	4	4	4	4	3	5	4	3
825	53	F	NM	4	1	5	5	1	5	4	3	5	3	4	4	4	4	3	3	2	5	4	2	5	5	5	3
826	53	F	NM	3	4	5	5	4	5	4	5	5	4	2	4	3	5	3	4	5	5	4	4	5	4	2	5
827	53	M	NM	2	4	5	3	2	4	4	4	5	4	2	3	2	5	1	5	2	3	3	2	5	4	2	3
828	54	M	A	5	2	4	5	3	5	2	4	5	5	2	5	3	4	1	5	4	4	5	2	3	4	5	3
829	54	M	A	1	5	5	1	5	1	2	2	4	2	1	3	1	4	1	2	3	1	2	3	4	3	1	2
830	54	M	A	5	4	5	5	5	5	4	5	5	5	1	3	3	3	5	5	5	4	3	4	4	5	2	4
831	54	F	A	2	1	5	5	3	5	3	5	5	3	2	4	4	5	2	2	1	3	4	5	5	5	2	3
832	54	F	A	4	1	5	5	1	4	4	5	5	3	4	5	4	5	5	5	3	5	5	5	5	5	3	5
833	54	F	NM	4	3	5	4	3	4	3	3	4	4	3	4	3	3	3	4	4	4	4	3	4	4	3	4
834	54	F	NM	2	2	5	5	1	5	1	4	5	5	5	4	1	5	2	5	4	4	2	3	5	5	1	3
835	54	F	NM	5	1	5	5	1	4	4	5	5	5	5	4	2	4	3	5	5	4	5	4	4	5	5	4
836	54	F	NM	3	3	5	3	3	2	2	4	5	3	2	3	2	5	2	3	3	2	3	1	4	2	3	2
837	54	F	NM	2	5	4	1	3	3	3	5	3	3	4	2	1	4	1	3	4	1	3	1	4	3	3	1
838	54	F	NM	5	5	5	1	4	3	3	3	4	2	1	2	1	3	2	2	5	1	3	1	1	3	2	2
839	54	F	NM	3	4	5	3	1	3	3	3	5	4	4	3	1	4	1	4	3	2	3	1	4	3	4	3
840	54	M	NM	3	2	5	5	1	4	3	5	5	4	1	4	4	2	4	5	3	3	4	3	4	5	3	4
841	54	F	NM	3	5	5	3	3	4	4	3	5	4	3	4	2	5	1	4	4	2	3	3	5	5	5	2
842	54	F	NM	3	3	5	4	4	4	3	2	5	3	4	3	1	3	3	3	2	4	2	2	4	3	4	4
843	54	F	NM	4	2	5	3	1	3	5	5	5	5	5	3	3	5	3	5	5	3	4	2	4	4	4	3
844	54	F	NM	5	1	5	5	1	5	5	5	5	5	5	5	2	5	5	5	4	4	4	3	5	5	5	5
845	55	M	A	3	5	5	5	3	4	5	3	5	5	3	3	4	5	5	5	5	3	5	3	5	4	3	5
846	55	F	A	3	2	4	5	4	4	3	5	5	5	2	4	2	3	3	5	4	4	5	3	5	5	5	3
847	55	M	A	5	1	5	5	1	4	5	5	5	4	5	4	3	4	5	4	3	4	4	3	4	4	3	4
848	55	M	A	2	1	5	4	4	2	2	4	5	3	1	2	3	5	3	3	4	4	2	4	4	5	2	2
849	55	F	A	5	1	5	5	2	5	5	5	5	5	3	5	3	4	5	5	5	5	5	3	5	5	5	1
850	55	M	A	4	1	4	5	3	5	4	4	4	5	3	4	3	2	5	4	4	4	3	4	3	4	3	4
851	55	M	M	4	3	5	3	3	5	3	5	5	4	3	4	5	4	5	4	4	5	4	5	5	5	4	5
852	55	F	NM	5	1	5	5	3	5	5	5	5	5	3	5	4	5	4	5	5	5	5	5	5	5	5	5
853	56	M	A	4	1	5	5	4	5	4	5	5	5	2	4	5	5	5	5	4	5	4	4	4	4	3	5
854	56	M	M	4	4	4	4	3	4	4	4	4	4	4	4	4	4	4	4	4	4	4	3	4	4	4	4
855	56	M	M	3	5	4	1	3	5	4	5	5	3	2	5	5	5	3	2	4	5	3	4	5	3	3	3
856	56	F	NM	4	3	5	4	1	3	3	5	5	4	5	3	2	4	2	4	4	1	2	1	4	4	5	2
857	56	F	NM	4	3	5	5	1	5	5	5	5	5	5	3	4	4	3	5	3	3	4	2	4	5	5	5
858	56	F	NM	3	2	5	4	1	3	3	4	4	4	4	4	3	4	2	4	4	4	3	2	4	4	4	3
859	56	F	NM	4	2	5	5	1	3	4	4	5	5	4	3	2	4	5	4	5	3	3	1	4	5	3	2
860	57	M	A	3	2	4	2	2	3	2	4	2	3	3	2	2	3	4	4	5	3	4	2	4	4	4	3
861	57	M	A	1	1	5	5	5	4	2	4	5	5	1	2	3	5	1	5	2	4	4	4	4	4	1	2
862	57	F	A	5	3	5	5	1	5	5	5	5	5	5	5	3	5	3	5	4	5	4	5	5	5	4	4
863	57	F	NM	3	3	5	4	1	3	3	3	5	4	4	3	2	5	3	5	4	3	3	2	5	4	3	3
864	57	M	NM	4	4	5	3	1	3	4	4	5	4	4	4	3	1	1	4	2	2	3	1	1	3	4	1
865	57	F	NM	4	1	4	4	1	4	2	4	4	4	4	4	3	4	4	4	4	4	2	3	4	3	4	4
866	57	F	NM	5	1	5	4	2	3	4	3	5	4	4	2	2	3	3	3	5	2	3	1	3	4	4	3
867	57	M	NM	3	3	4	3	5	2	2	2	3	1	1	1	1	5	1	1	2	2	2	1	3	1	1	1
868	57	F	NM	5	1	5	4	1	4	3	5	5	5	5	4	1	3	5	5	5	1	3	3	5	5	5	5
869	57	F	NM	4	5	5	5	1	3	4	5	5	5	4	4	3	3	1	4	4	4	3	2	4	4	5	4
870	58	F	A	4	2	5	3	1	4	5	5	5	4	4	2	1	5	5	4	2	2	5	5	5	5	3	2
871	58	M	A	4	1	5	5	1	5	5	5	5	5	5	5	4	5	5	5	4	4	5	4	5	5	5	5
872	58	M	A	5	2	5	5	3	5	4	5	5	4	3	5	5	5	5	4	4	5	4	4	5	4	5	5
873	58	F	A	4	1	5	4	1	4	4	4	5	4	4	3	4	4	4	4	4	3	4	4	4	4	4	4
874	58	M	A	4	1	4	5	2	4	5	5	4	4	3	3	4	4	4	5	3	4	5	5	5	5	3	4
875	58	F	A	2	3	5	5	1	4	5	5	5	4	4	4	3	5	3	4	5	5	4	2	4	4	4	3
876	58	F	A	4	1	5	5	4	5	4	5	5	5	4	5	3	5	5	5	5	4	4	4	5	5	4	3
877	58		A	3	3	5	3	2	5	5	5	5	4	4	4	2	4	3	4	4	4	3	2	5	5	4	3
878	58	M	M	5	3	5	4	1	5	5	5	5	5	5	5	4	5	5	5	4	5	4	5	5	5	4	5
879	58	F	NM	3	4	5	4	1	3	3	4	5	4	4	4	3	3	4	4	4	3	4	3	4	4	4	3
880	58	F	NM	3	4	4	3	2	2	3	2	4	3	3	2	2	3	2	3	4	3	3	2	3	3	3	2
881	58	M	NM	4	1	5	5	5	4	4	5	5	5	1	4	5	5	1	5	5	4	4	4	4	5	1	3
882	59	F	A	5	3	5	4	1	5	5	5	5	5	5	4	1	5	5	5	5	3	3	3	4	5	4	5
883	59	F	A	4	1	5	5	1	5	5	5	5	5	5	5	4	4	3	5	5	5	5	2	5	5	5	5
884	59	F	A	4	1	4	5	1	5	5	4	5	5	5	5	3	5	2	5	4	5	2	2	5	5	4	5
885	59	F	A	5	1	5	5	1	5	5	5	5	5	5	5	5	5	5	5	5	5	5	4	5	5	5	4
886	59	F	A	4	1	5	5	3	4	4	5	5	5	3	4	4	2	5	3	5	5	4	5	4	4	4	1
887	59	M	A	3	1	5	5	1	5	5	5	5	5	5	5	5	5	2	5	5	5	5	1	5	5	5	5
888	59	M	NM	3	2	4	3	3	3	5	4	4	4	3	3	3	5	3	4	4	3	4	2	4	4	3	3
889	59	F	NM	3	1	5	5	5	4	5	4	5	5	1	4	1	1	1	5	2	4	5	3	4	5	1	4
890	59	F	NM	5	1	5	5	1	5	3	5	5	5	5	5	4	4	1	5	2	5	5	3	5	5	5	3
891	59	F	NM	4	2	5	4	3	4	3	5	5	4	2	2	4	4	4	3	5	2	2	3	4	3	2	2
892	59	F	NM	4	1	5	5	3	4	4	5	5	5	3	5	4	5	2	5	4	5	4	4	5	5	4	4
893	59	F	NM	4	2	5	5	1	4	4	4	5	5	4	4	3	2	1	4	4	3	4	3	4	4	4	3
894	59	M	NM	5	3	5	4	3	3	5	5	5	5	4	3	4	5	4	5	5	5	4	3	5	5	5	5
895	59	M	NM	4	2	5	5	1	5	4	5	5	3	5	4	4	2	3	2	4	5	4	4	3	4	5	4
896	60	F	A	4	1	5	5	1	5	5	5	5	5	5	5	4	5	5	5	5	5	5	4	5	5	5	5
897	60	F	A	5	2	5	5	1	4	3	4	5	4	4	3	2	4	3	4	4	4	4	5	4	5	5	3
898	60	M	A	4	1	5	5	2	5	4	5	5	4	3	5	5	5	3	4	5	5	4	5	5	5	3	5
899	60	F	A	5	4	5	2	1	5	5	4	4	3	4	3	4	2	4	3	3	2	3	3	4	3	4	4
900	60	M	NM	2	2	4	4	3	2	2	4	4	5	1	3	2	3	2	4	2	3	2	3	4	4	1	1
901	60	M	NM	4	1	5	4	1	4	5	5	5	5	5	4	4	5	3	5	4	4	4	3	4	4	4	4
902	60	F	NM	3	3	5	5	3	5	4	3	5	5	4	5	2	5	4	5	5	5	3	4	5	5	1	4
903	60	F	NM	5	3	5	5	1	5	4	2	5	5	5	5	1	5	2	5	3	5	4	2	5	5	5	5
904	60	F	NM	4	3	5	5	3	4	3	3	5	4	3	2	1	5	3	4	5	3	4	1	5	4	3	3
905	60	F	NM	5	4	5	4	1	5	5	5	5	5	3	5	1	5	3	5	5	5	3	3	5	5	4	5
906	60	M	NM	4	1	4	5	3	4	4	5	4	4	3	4	3	3	4	5	3	4	4	3	3	3	3	3
907	60	F	NM	5	2	4	3	1	4	5	5	4	3	3	3	3	2	5	4	4	3	3	2	2	3	2	1
908	60	F	NM	2	2	5	4	3	4	2	3	5	3	2	3	2	1	4	3	5	3	3	4	4	3	2	3
909	60	M	NM	5	1	5	5	2	5	5	5	5	5	5	5	5	5	5	5	4	4	5	4	5	5	5	5
910	60	M	NM	4	3	5	4	3	4	4	4	4	4	4	3	3	3	2	4	4	3	3	3	2	4	4	3
911	60	F	NM	3	2	5	4	1	2	5	3	5	5	3	2	1	3	5	5	3	1	1	2	3	2	1	1
912	60	F	NM	4	1	5	5	1	5	5	5	5	5	5	5	4	4	4	5	5	4	5	4	5	5	3	4
913	60	M	NM	2	3	4	3	4	5	2	2	4	4	2	3	2	1	1	4	5	3	3	1	3	4	1	1
914	60	F	NM	3	1	5	5	1	5	5	5	5	5	5	5	5	5	3	5	5	4	4	4	5	4	5	4
915	61	F	A	4	3	5	2	1	5	3	3	4	3	5	4	1	4	5	3	5	4	4	3	4	3	5	4
916	61	M	NM	5	4	5	4	3	5	5	5	5	5	3	4	3	1	1	5	2	5	4	1	5	5	3	3
917	61	F	NM	4	1	5	5	3	5	5	4	5	5	4	5	5	5	5	5	5	5	4	5	5	5	5	5
918	62	M	A	4	4	5	3	5	2	3	5	5	4	2	3	2	4	2	4	4	3	3	2	3	4	4	2
919	62	F	A	4	2	5	4	1	5	4	5	5	3	3	4	3	4	4	4	3	4	4	3	5	4	2	5
920	62	F	A	4	1	4	5	1	4	5	4	5	5	4	5	3	5	5	5	4	4	3	3	5	5	4	4
921	62	F	A	5	1	5	5	1	4	3	5	5	5	3	4	4	3	5	4	5	4	4	4	4	4	4	3
922	62	F	A	4	3	5	5	1	4	4	4	5	5	4	4	2	5	5	5	4	4	4	2	5	4	4	4
923	62	F	A	4	1	5	5	2	5	2	5	5	3	2	4	4	5	2	3	4	5	4	4	4	5	3	4
924	62	M	NM	4	2	5	4	1	3	2	2	4	4	3	4	2	3	2	4	2	3	3	2	4	4	2	1
925	62	F	NM	4	3	5	3	2	4	3	4	5	4	3	3	1	1	4	3	5	4	5	2	5	1	5	4
926	62	F	NM	1	2	5	2	1	3	1	5	5	4	4	2	3	5	1	1	1	1	1	2	4	2	4	1
927	62	M	NM	4	2	5	4	3	4	4	2	5	4	3	2	2	5	1	4	4	1	3	1	5	5	4	4
928	62	M	NM	4	2	5	4	2	4	3	4	4	4	4	3	3	4	4	4	4	3	4	3	4	4	4	3
929	62	F	NM	4	1	4	4	2	4	4	4	4	5	4	2	2	2	3	5	3	2	3	3	3	5	3	3
930	62	M	NM	5	1	5	5	5	5	5	1	5	5	1	1	1	1	1	5	3	1	3	5	5	5	1	1
931	63	F	A	3	4	5	4	4	4	2	4	4	3	2	2	2	4	4	3	4	2	3	2	4	3	3	2
932	63	M	A	4	2	5	5	5	4	4	5	5	5	1	4	3	3	5	5	3	3	5	3	4	5	2	3
933	63	F	NM	3	2	5	2	1	2	2	2	5	3	4	4	1	3	2	2	3	2	2	1	5	3	5	1
934	63	M	NM	3	2	5	5	3	4	4	5	5	5	4	5	4	3	3	5	5	3	3	3	4	5	4	3
935	63	F	NM	4	1	5	5	1	4	4	3	5	5	5	4	3	4	2	5	5	3	4	1	5	5	4	4
936	63	M	NM	4	1	5	5	1	4	4	4	5	5	5	4	4	4	5	5	5	5	5	4	5	5	5	5
937	64	F	A	5	1	5	5	5	5	5	5	5	5	4	4	4	5	5	5	5	3	4	4	5	5	4	4
938	64	M	A	5	1	5	4	3	5	5	5	5	4	5	4	5	5	2	3	4	1	4	5	5	4	5	5
939	64	F	A	3	5	4	3	1	5	3	4	5	4	5	3	2	5	5	4	5	2	4	2	3	3	4	3
940	64	F	A	5	3	5	5	1	5	5	5	5	5	5	4	3	5	5	5	4	4	4	3	5	5	4	4
941	64	M	A	4	2	5	5	3	5	3	5	5	2	3	5	3	4	2	3	5	5	3	4	5	5	4	3
942	64	M	A	3	4	5	4	3	4	4	4	5	4	3	4	4	4	4	4	4	4	3	3	4	4	3	3
943	64	M	M	3	2	4	3	5	3	4	5	4	2	2	2	3	3	5	2	3	4	3	4	4	2	1	1
944	64	F	NM	4	1	5	5	1	5	4	4	5	4	4	3	5	3	5	4	4	4	4	5	5	4	5	4
945	64	M	NM	4	2	5	5	5	4	4	5	4	5	3	4	5	3	1	5	2	4	4	3	4	4	4	4
946	65	F	A	4	3	5	4	1	5	5	4	5	3	4	4	3	3	5	4	5	5	4	2	3	4	5	5
947	65	M	A	4	2	4	2	2	4	4	5	4	4	1	3	2	1	5	4	3	3	4	4	4	3	3	1
948	65	M	A	5	1	5	5	3	5	5	5	5	4	2	3	4	5	5	4	3	3	4	4	5	5	2	4
949	65	F	NM	4	1	5	5	1	5	5	5	5	4	4	5	4	5	4	5	5	4	4	3	5	5	5	5
950	65	F	NM	5	1	5	5	1	5	5	5	5	5	5	5	4	5	3	5	5	5	4	3	5	5	5	5
951	65	F	NM	3	2	5	5	4	4	3	5	5	4	2	3	5	4	1	4	3	4	5	1	4	4	3	4
952	66	M	A	3	1	5	4	3	5	4	5	5	4	2	5	4	5	5	4	4	4	4	4	5	4	2	3
953	66	M	A	4	5	5	4	1	5	4	5	5	4	3	4	5	5	5	5	4	4	4	4	4	4	4	4
954	66	F	A	3	2	5	5	3	5	4	4	4	4	3	5	3	4	5	5	3	5	4	3	4	5	3	4
955	66	M	A	5	1	5	5	1	4	5	4	5	5	5	3	4	5	5	5	5	4	4	3	5	5	5	4
956	66	F	A	4	2	3	5	1	4	4	4	4	5	5	4	4	1	4	5	3	4	5	3	2	5	3	2
957	66	M	NM	1	4	5	2	1	2	1	3	4	3	4	4	3	2	1	3	1	3	2	1	2	3	4	2
958	66	M	NM	3	4	5	4	2	5	3	2	5	5	2	4	3	2	1	4	5	4	3	2	4	4	2	4
959	66	F	NM	4	5	5	4	2	3	3	2	5	4	3	3	2	3	1	3	4	2	3	1	4	3	3	4
960	66	F	NM	4	2	5	4	3	4	3	4	5	4	3	4	3	5	2	4	4	4	4	4	5	4	3	4
961	67	F	A	4	1	3	3	4	5	4	5	3	4	2	4	4	5	5	4	3	4	4	4	5	4	2	3
962	67	M	A	5	2	5	5	5	5	3	5	5	5	1	5	2	2	5	5	3	4	4	3	5	5	1	2
963	67	M	A	4	2	5	5	5	4	5	4	5	5	1	2	2	3	5	4	4	2	4	2	3	4	2	1
964	67	F	A	4	3	5	4	2	4	4	4	5	3	3	3	2	4	3	3	5	4	4	3	4	4	5	3
965	67	F	NM	2	4	5	5	3	4	2	4	5	4	3	3	3	4	4	4	4	4	4	3	4	5	3	4
966	68	F	NM	4	4	5	4	1	3	3	4	5	5	5	2	2	4	2	5	5	2	4	2	3	5	5	4
967	69	F	A	2	4	5	2	1	4	4	4	5	3	5	4	2	2	4	1	5	2	3	4	4	4	5	5
968	69	F	A	4	2	5	2	1	4	3	3	5	4	5	3	3	3	2	2	3	2	3	2	5	5	5	3
969	69	M	NM	2	4	5	3	3	2	2	1	5	3	3	2	1	1	1	2	4	2	1	1	3	3	2	2
970	69	F	NM	3	4	5	3	1	2	3	4	5	3	4	3	1	2	5	3	3	2	2	3	3	4	4	2
971	69	M	NM	4	2	5	4	5	4	4	4	3	4	1	4	3	5	1	4	3	4	4	5	4	4	4	4
972	69	M	NM	5	2	5	3	3	4	5	3	5	5	4	4	2	4	4	4	4	3	4	2	4	4	2	4
973	70	F	A	3	5	5	5	1	5	4	5	5	5	5	4	5	5	5	5	5	4	4	4	5	5	5	3
974	70	M	A	2	1	5	5	4	4	4	5	5	5	3	4	3	4	5	5	2	3	2	4	5	5	3	4
975	70	M	A	4	1	5	5	1	4	5	5	5	5	4	3	3	5	5	5	5	3	4	4	4	5	3	4
976	70	F	A	4	2	5	3	1	4	3	5	5	3	5	3	2	5	5	4	5	3	5	2	5	4	5	3
977	70	F	NM	5	1	5	4	3	5	5	2	5	5	4	4	2	5	3	4	4	3	4	3	4	4	3	3
978	70	M	NM	4	1	5	5	3	5	5	5	5	5	4	4	3	5	2	4	4	3	4	4	4	5	4	3
979	70	M	NM	4	2	5	5	1	2	4	5	5	4	4	3	3	3	3	4	4	4	4	2	4	4	4	4
980	70	M	NM	4	3	5	3	2	5	4	2	5	4	4	2	3	3	3	4	4	2	5	2	5	4	4	4
981	71	M	A	5	1	5	5	2	4	5	5	5	5	4	4	3	4	2	5	3	2	5	2	4	5	4	2
982	71	M	NM	5	5	4	5	4	5	3	5	4	5	2	4	5	2	1	5	2	5	4	5	4	5	3	4
983	71	F	NM	4	2	5	5	1	3	3	2	5	4	4	3	2	3	1	4	5	1	2	1	4	3	4	2
984	71	F	NM	4	2	5	4	5	5	3	3	5	3	1	4	3	4	1	3	2	3	4	5	4	3	5	1
985	72	F	A	3	4	2	2	1	3	3	3	3	4	5	3	3	1	3	4	3	2	3	3	2	3	5	2
986	72	F	A	5	1	5	5	4	5	5	5	5	5	2	4	2	5	4	5	4	5	5	2	5	5	2	5
987	72	M	M	5	1	5	5	5	5	5	5	5	4	3	3	3	4	5	5	4	5	3	4	4	5	1	4
988	72	M	NM	3	3	5	5	4	4	4	4	5	4	2	3	2	4	1	4	2	2	4	1	5	4	3	4
989	72	F	NM	4	1	5	5	1	3	5	5	4	5	4	3	3	4	3	5	3	3	3	4	4	5	3	3
990	73	F	A	1	1	3	5	2	4	3	5	3	4	2	3	5	4	2	4	4	3	2	4	5	5	4	3
991	73	F	A	5	1	5	5	1	5	4	5	5	5	5	5	4	5	5	5	5	4	3	2	5	5	5	4
992	73	M	A	4	3	5	3	1	4	4	5	5	3	4	3	4	5	5	4	4	4	4	4	5	5	4	3
993	73	F	A	4	2	5	5	2	5	4	4	5	5	4	4	3	4	3	4	2	4	3	3	4	4	4	5
994	73	M	NM	5	3	5	5	3	4	5	5	5	5	3	2	3	5	3	5	5	3	3	3	4	4	3	2
995	73	M	NM	5	3	4	2	5	5	5	5	5	4	1	3	2	2	3	5	5	3	4	3	5	5	2	1
996	73	F	NM	5	2	5	2	1	5	4	4	5	4	4	4	4	4	5	4	4	4	4	3	5	4	4	5
997	73	F	NM	3	2	4	4	1	4	4	3	5	4	4	3	3	5	3	4	4	3	4	2	3	4	3	3
998	74	F	A	4	4	5	4	2	5	5	3	5	5	4	5	4	5	4	5	4	5	4	4	4	5	4	5
999	74	F	NM	3	4	5	2	1	4	4	4	4	3	2	1	1	5	1	3	3	1	4	2	4	3	4	1
1000	75	M	A	5	1	3	4	5	4	4	5	3	3	2	3	4	3	5	3	3	2	4	5	3	4	2	1
1001	75	M	A	4	3	5	4	1	3	3	4	5	4	1	3	3	3	2	4	4	3	3	2	4	4	3	3
1002	75	F	NM	4	3	4	4	5	3	4	3	4	4	2	3	3	3	2	4	4	4	4	3	4	4	3	3
1003	76	F	A	3	4	3	4	4	3	3	3	4	4	3	3	3	3	3	4	3	3	3	2	3	4	3	3
1004	76	F	NM	4	2	5	5	2	4	4	4	5	4	4	4	4	4	4	4	5	3	4	3	4	4	4	4
1005	76	M	NM	3	5	5	3	1	4	3	5	5	3	2	2	1	4	1	3	2	1	3	1	4	2	2	2
1006	78	F	NM	4	5	4	4	5	4	4	4	5	4	3	4	3	5	2	4	4	4	4	3	5	4	3	3
1007	78	F	NM	5	3	5	5	1	4	5	4	5	4	5	4	2	5	5	5	5	4	4	4	4	5	5	3
1008	79	F	NM	3	5	5	3	4	2	2	3	5	4	4	3	2	3	4	3	4	3	3	2	3	3	4	3
1009	80	F	M	2	5	5	4	5	2	2	5	5	3	1	5	3	3	5	3	1	4	5	4	3	5	1	1
1010	80	F	NM	3	4	5	3	2	4	4	2	5	4	4	3	1	5	5	4	4	3	4	2	4	4	4	4
1011	83	M	NM	4	3	5	3	4	3	4	2	5	5	1	5	1	5	1	5	1	5	5	2	5	5	1	4
1012	86	F	A	4	1	5	5	1	5	4	5	5	4	5	4	2	1	3	4	4	4	4	1	4	4	5	2
[truncated: 3 more columns]
